# Supplementary material for: Most cancers carry a substantial deleterious load due to Hill-Robertson interference
Source: eLife journal article supplement (doi:10.7554/elife.67790), 2022-09-01
Supplement: supp [file elife-67790-supp-v1.zip]

Archive with 24 entries (24 files):
- elife_poa_e67790_Figure_2_figure_supplement_1.pdf
- elife_poa_e67790_Figure_2_figure_supplement_2.pdf
- elife_poa_e67790_Figure_2_figure_supplement_3.pdf
- elife_poa_e67790_Figure_2_figure_supplement_4.pdf
- elife_poa_e67790_Figure_2_figure_supplement_5.pdf
- elife_poa_e67790_Figure_2_figure_supplement_6.pdf
- elife_poa_e67790_Figure_2_figure_supplement_7.pdf
- elife_poa_e67790_Figure_2_figure_supplement_8.pdf
- elife_poa_e67790_Figure_2_figure_supplement_9.pdf
- elife_poa_e67790_Figure_2_figure_supplement_10.pdf
- elife_poa_e67790_Figure_2_figure_supplement_11.pdf
- elife_poa_e67790_Figure_2_figure_supplement_12.pdf
- elife_poa_e67790_Figure_2_figure_supplement_13.pdf
- elife_poa_e67790_Figure_2_figure_supplement_14.pdf
- elife_poa_e67790_Figure_2_figure_supplement_15.pdf
- elife_poa_e67790_Figure_2_figure_supplement_16.pdf
- elife_poa_e67790_Figure_3_figure_supplement_1.pdf
- elife_poa_e67790_Figure_3_figure_supplement_2.pdf
- elife_poa_e67790_Figure_3_figure_supplement_3.pdf
- elife_poa_e67790_Figure_3_figure_supplement_4.pdf
- elife_poa_e67790_Figure_3_figure_supplement_5.pdf
- elife_poa_e67790_Figure_3_figure_supplement_6.pdf
- elife_poa_e67790_Supplementary_file_1.docx
- elife_poa_e67790_Supplementary_file_2.docx
