# Supplementary material for: Most cancers carry a substantial deleterious load due to Hill-Robertson interference
Source: eLife journal article supplement (doi:10.7554/elife.67790), 2022-09-01
Supplement: supp [file elife-67790-supp-v1.zip › elife_poa_e67790_Figure_2_figure_supplement_1.pdf]

# Coding sequence of a gene

# Counts

... ATG|CGC|**A**TC|CGA|TGC|CGA|TGG|CCG|TAG  
AGC|TTA|GCC|CGG|**T**TA|TAG|CCC|AAG|GCT  
**C**G|CGA|TTA|GCG|CTA|TAC|GGG|AGG|TAA ...

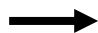

Observed dN = **2**  
Observed dS = **2**

*Take into account the 3-nucleotide context  
of every observed mutation*

... ATG|CGC|**A**TC|CGA|TG**C**|CGA|TGG|**C**CG|TAG  
AGC|**T**TA|G**C**C|CGG|**T**TA|TAG|**C**CC|AAG|GCT  
**C**G|CGA|**T**TA|GCG|CTA|TAC|GGG|A**G**G|TAA ...

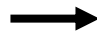

Permuted dN = **8**  
Permuted dS = **3**

*Derive the expected number of mutations  
with the same 3-nucleotide context*

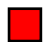

Non-synonymous

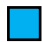

Synonymous
