# Supplementary material for: Most cancers carry a substantial deleterious load due to Hill-Robertson interference
Source: eLife journal article supplement (doi:10.7554/elife.67790), 2022-09-01
Supplement: supp [file elife-67790-supp-v1.zip › elife_poa_e67790_Figure_2_figure_supplement_4.pdf]

## A All Polymorphisms

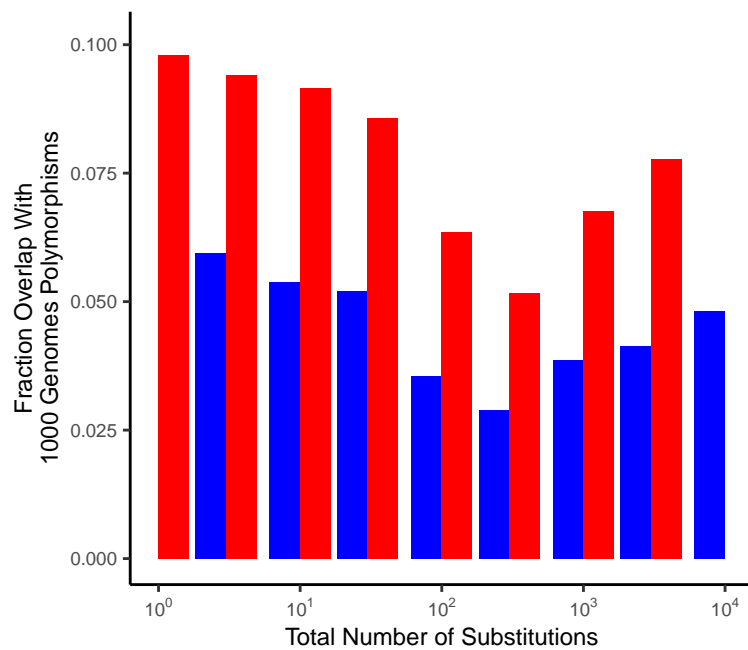

**B** Common Polymorphisms (MAF > 0.05%)

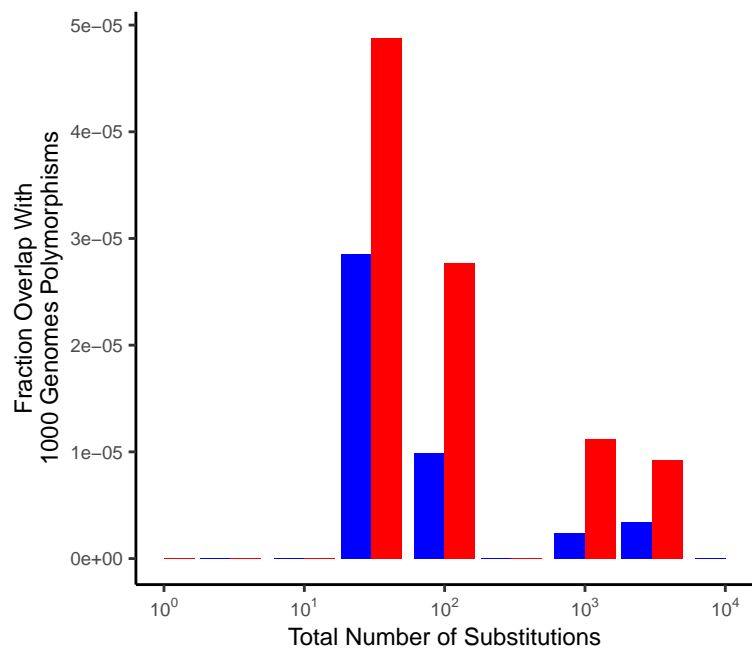

**C** Low-Frequency Polymorphisms (MAF > 0.01%)

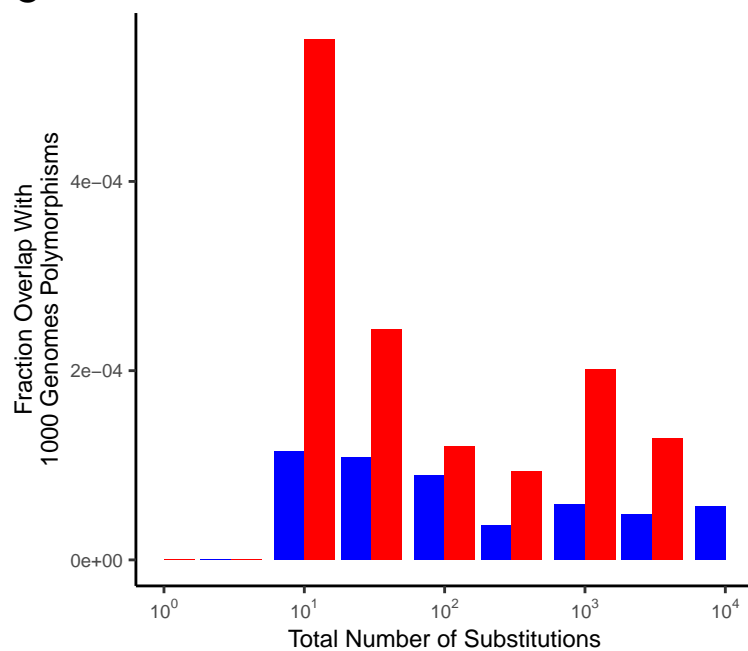

**D** Low-Frequency Polymorphisms (MAF > 0.005%)

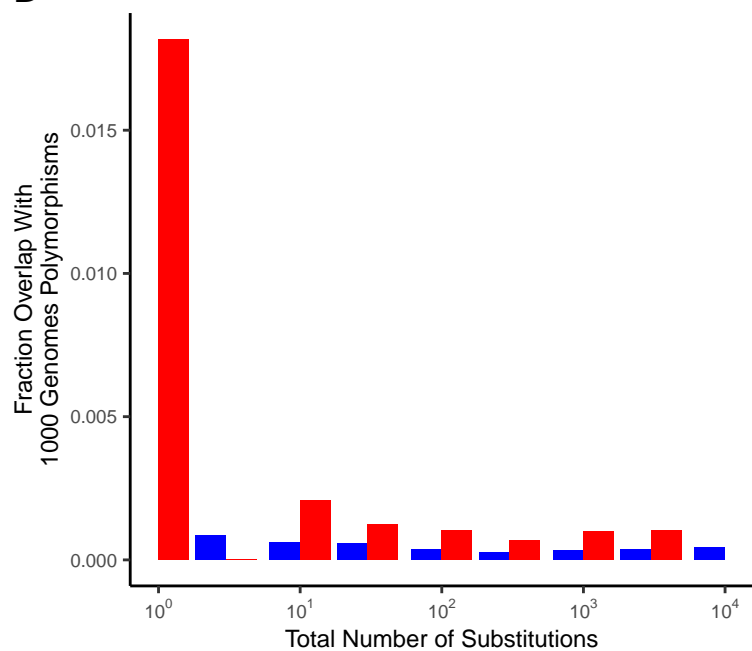

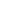 Non-Synonymous 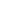 Synonymous
