# Supplementary material for: Most cancers carry a substantial deleterious load due to Hill-Robertson interference
Source: eLife journal article supplement (doi:10.7554/elife.67790), 2022-09-01
Supplement: supp [file elife-67790-supp-v1.zip › elife_poa_e67790_Figure_2_figure_supplement_15.pdf]

MC3 SNP Calls

dNdS-permutation

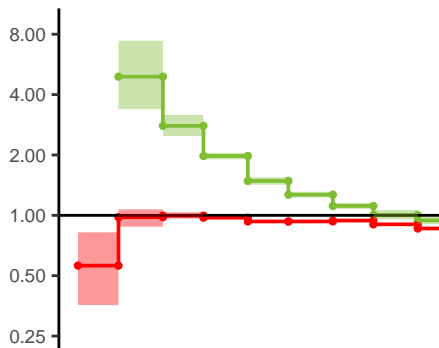

MC3 SNP Calls

dNdScv

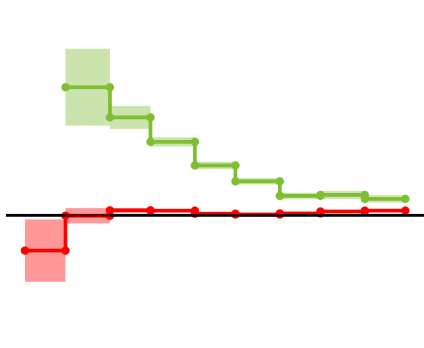

Mutect2 SNP Calls

dNdS-permutation

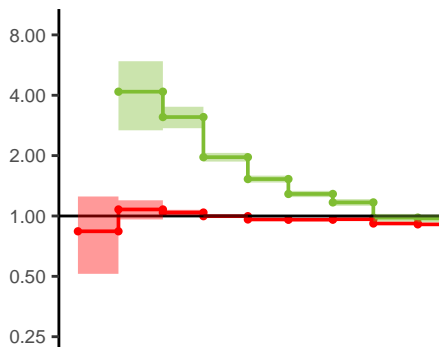

Mutect2 SNP Calls

dNdScv

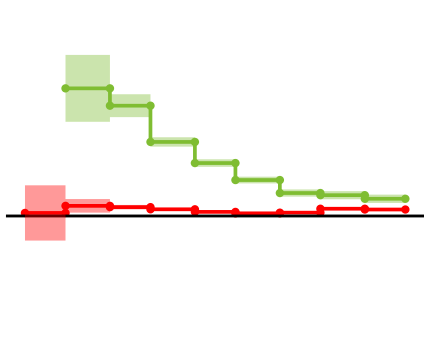

Total Number of Substitutions
