# Supplementary material for: Most cancers carry a substantial deleterious load due to Hill-Robertson interference
Source: eLife journal article supplement (doi:10.7554/elife.67790), 2022-09-01

A

 $N^0$ 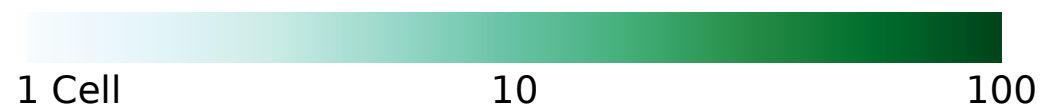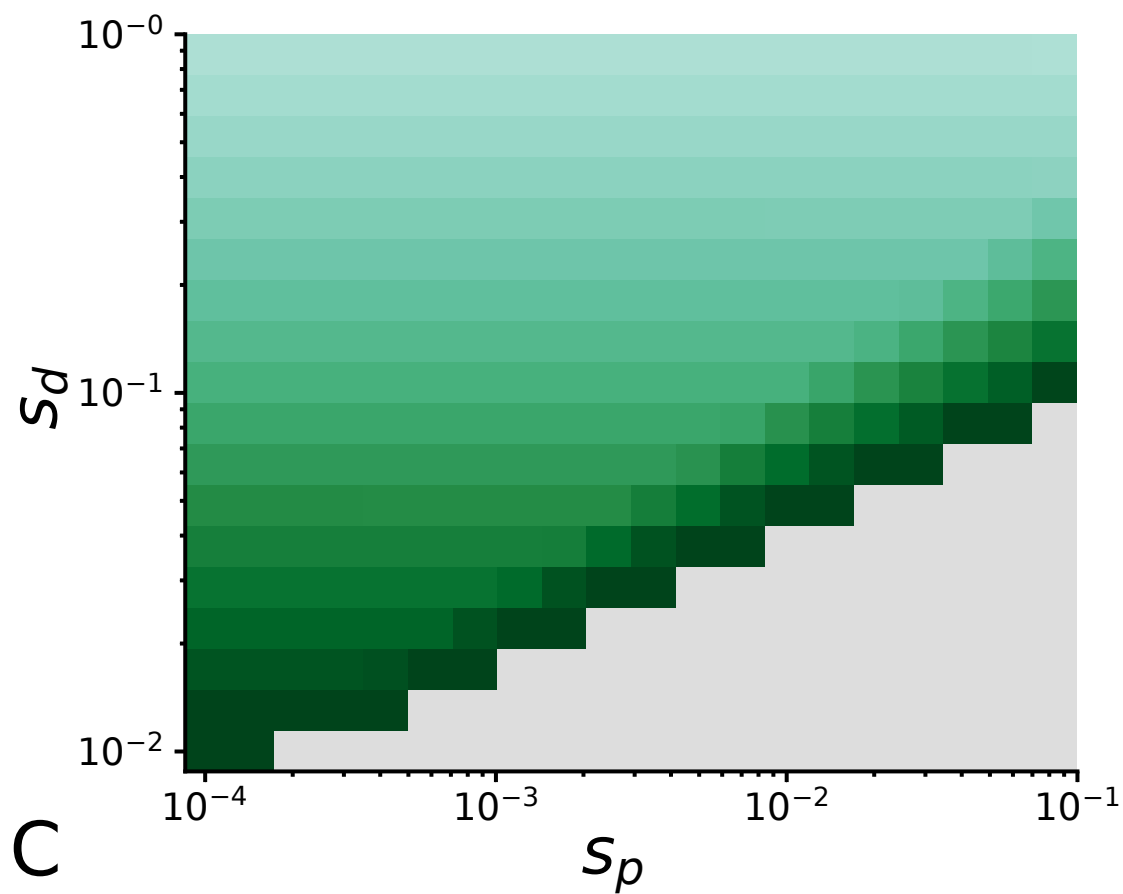

B

Age-Incidence Shape Parameter ( $k$ )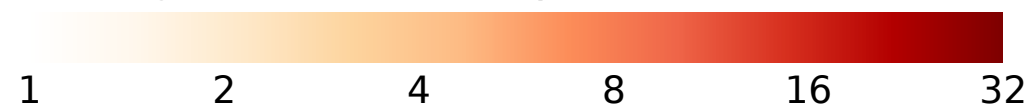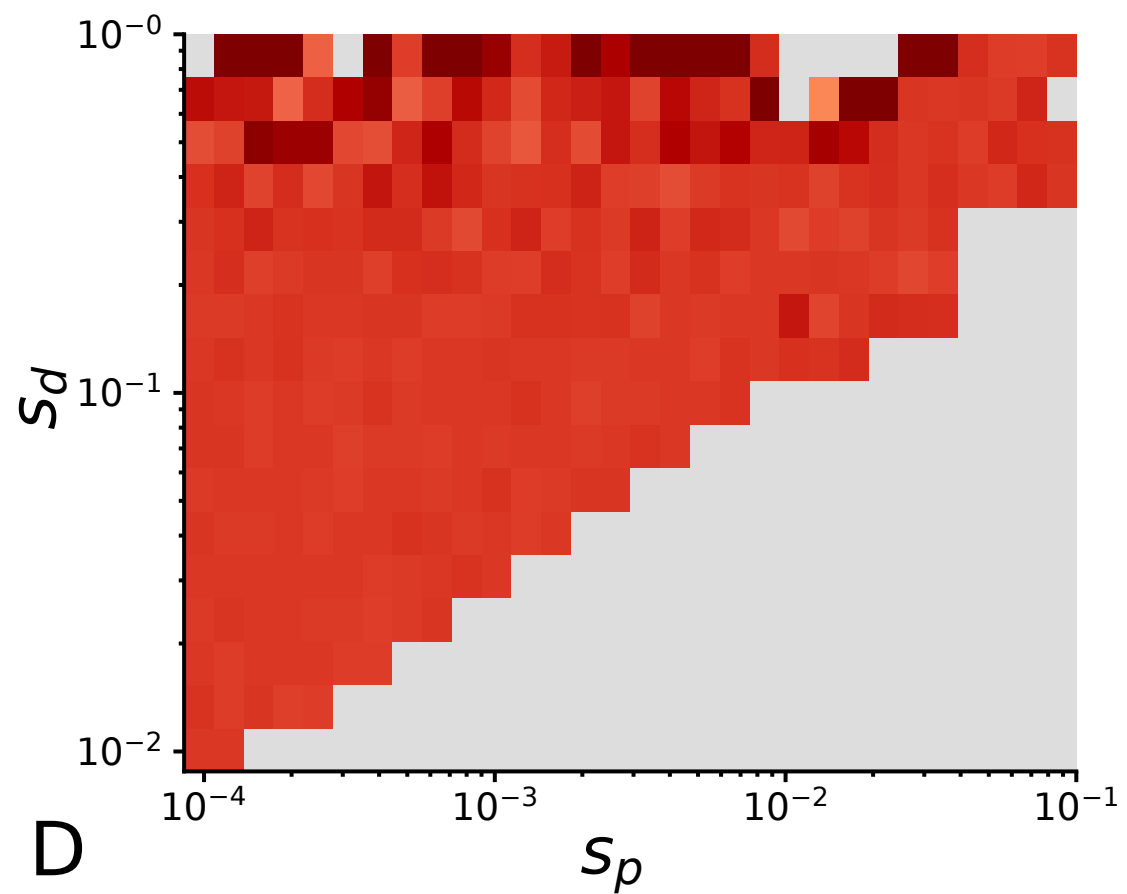

C

Mutational Burden Shape Parameter ( $n$ )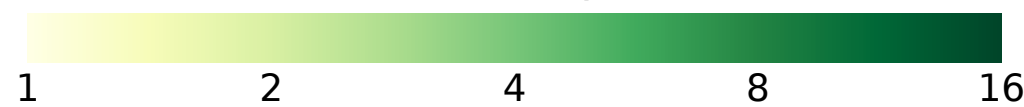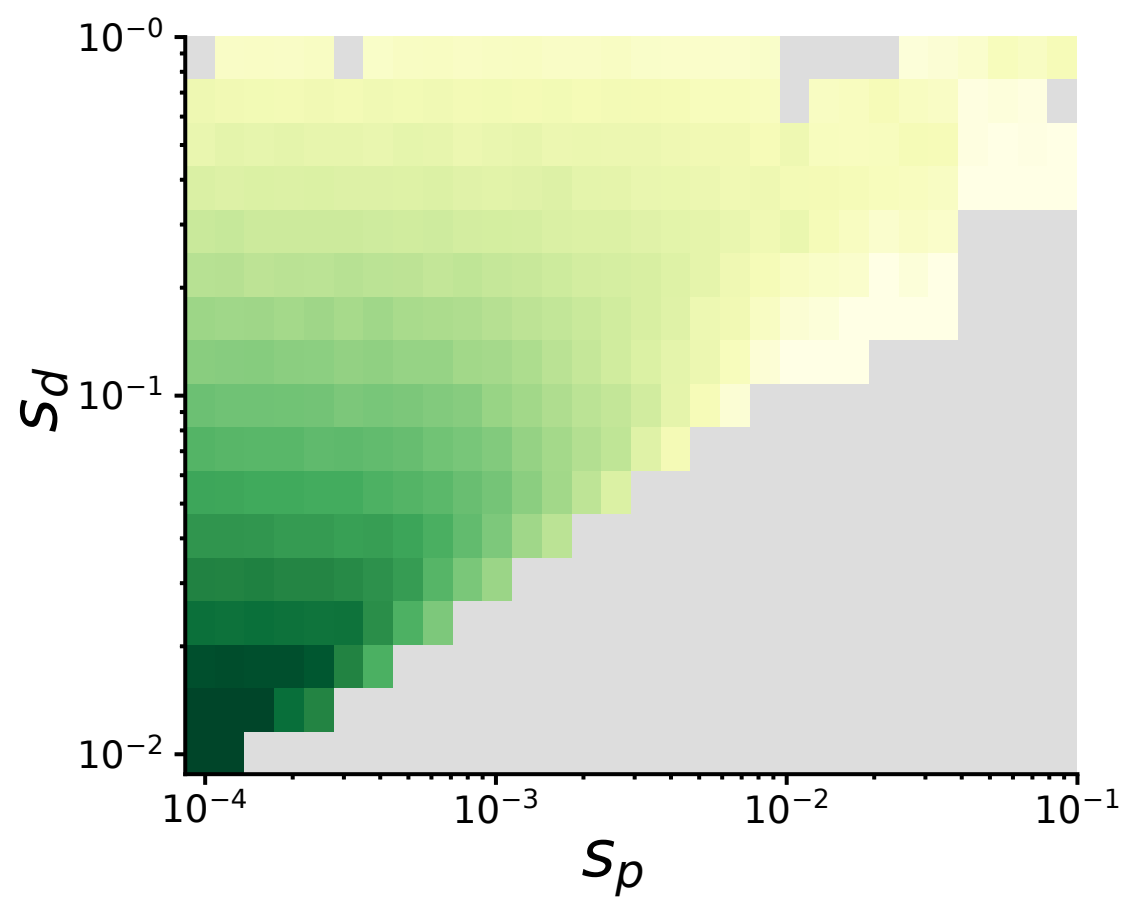

D

Mutational Burden Scale Parameter ( $p$ )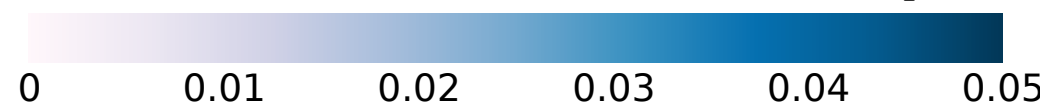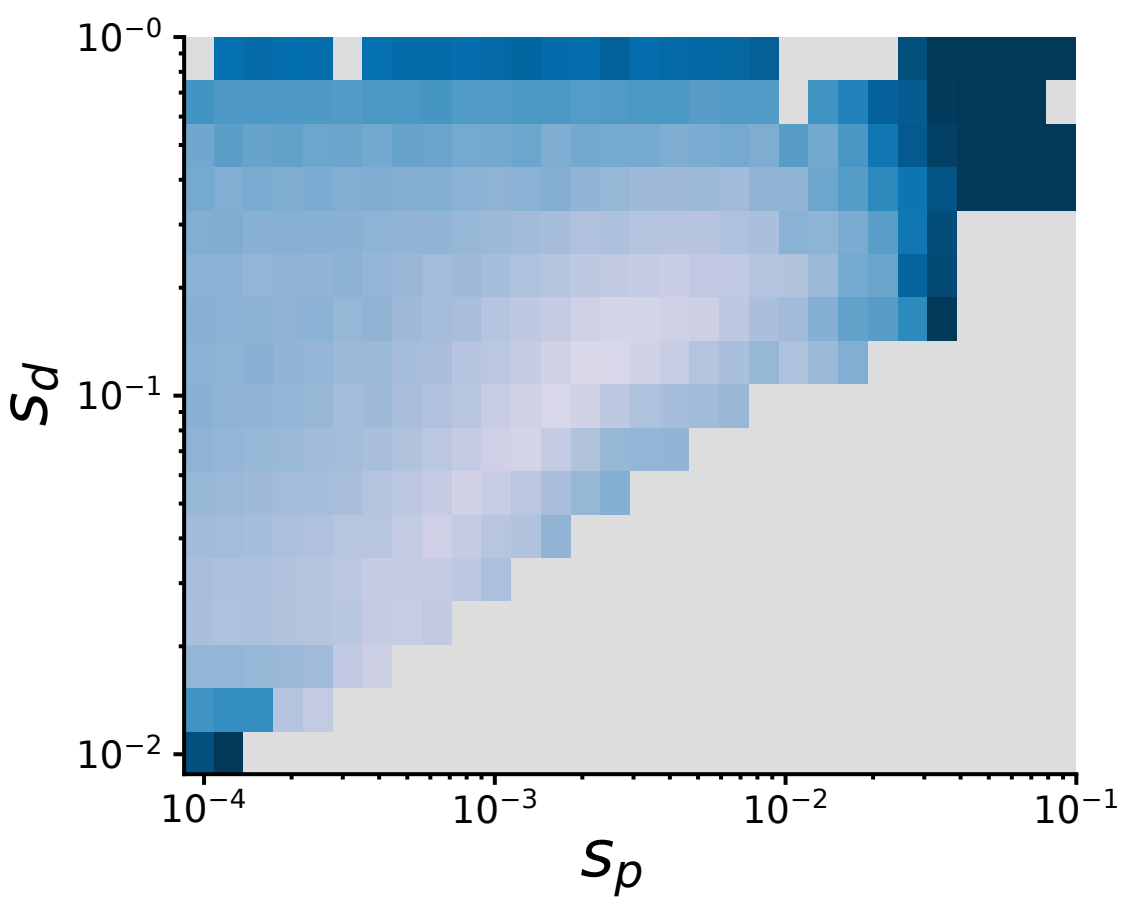

Supplement: supp [file elife-67790-supp-v1.zip › elife_poa_e67790_Figure_3_figure_supplement_2.pdf]
