# Supplementary material for: Most cancers carry a substantial deleterious load due to Hill-Robertson interference
Source: eLife journal article supplement (doi:10.7554/elife.67790), 2022-09-01

Average # of Hitchhikers per driver sweep

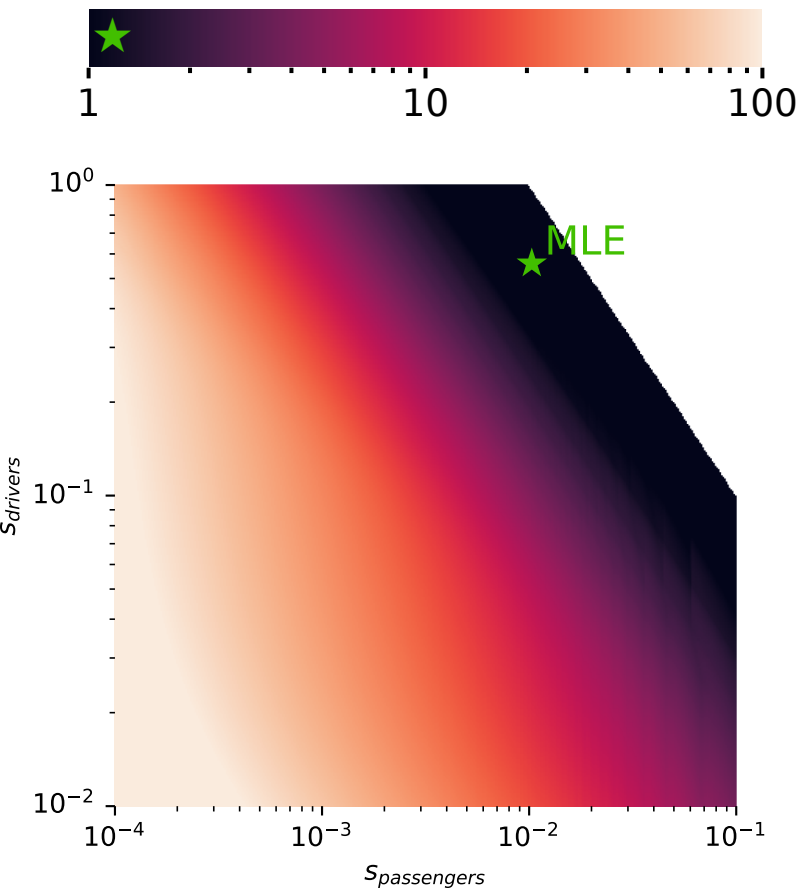

Fraction of passengers that hitchhike  
(versus Muller's ratchet)

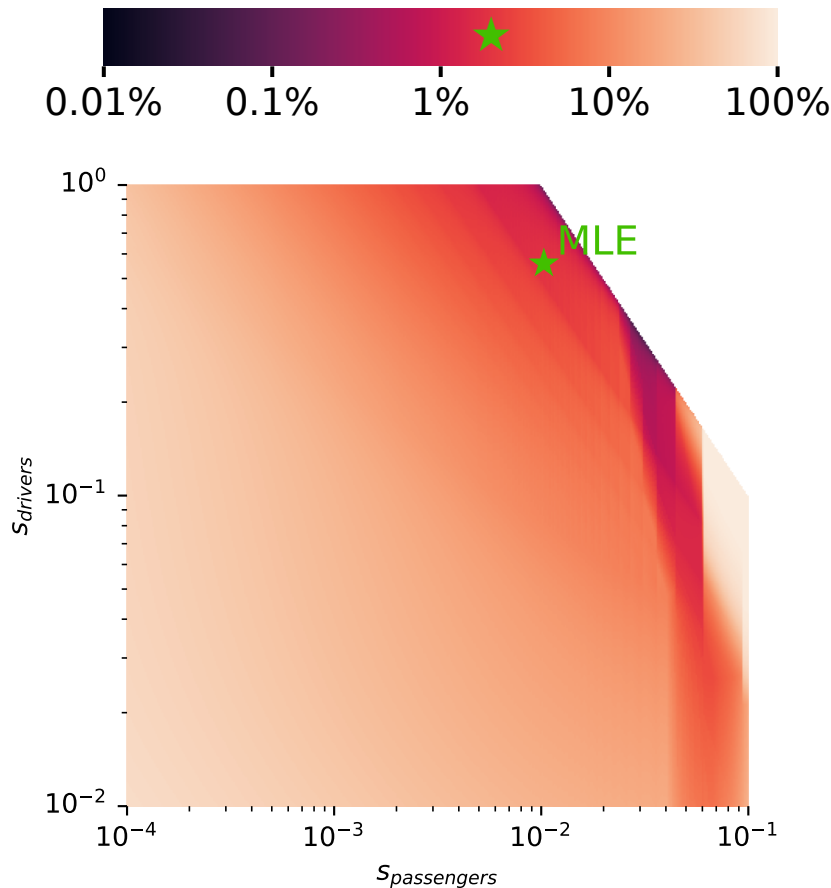

Supplement: supp [file elife-67790-supp-v1.zip › elife_poa_e67790_Figure_3_figure_supplement_6.pdf]
