# Supplementary material for: Most cancers carry a substantial deleterious load due to Hill-Robertson interference
Source: eLife journal article supplement (doi:10.7554/elife.67790), 2022-09-01
Supplement: supp [file elife_poa_e67790_Figure_2_figure_supplement_12.pdf › elife_poa_e67790_Figure_2_figure_supplement_12.pdf]

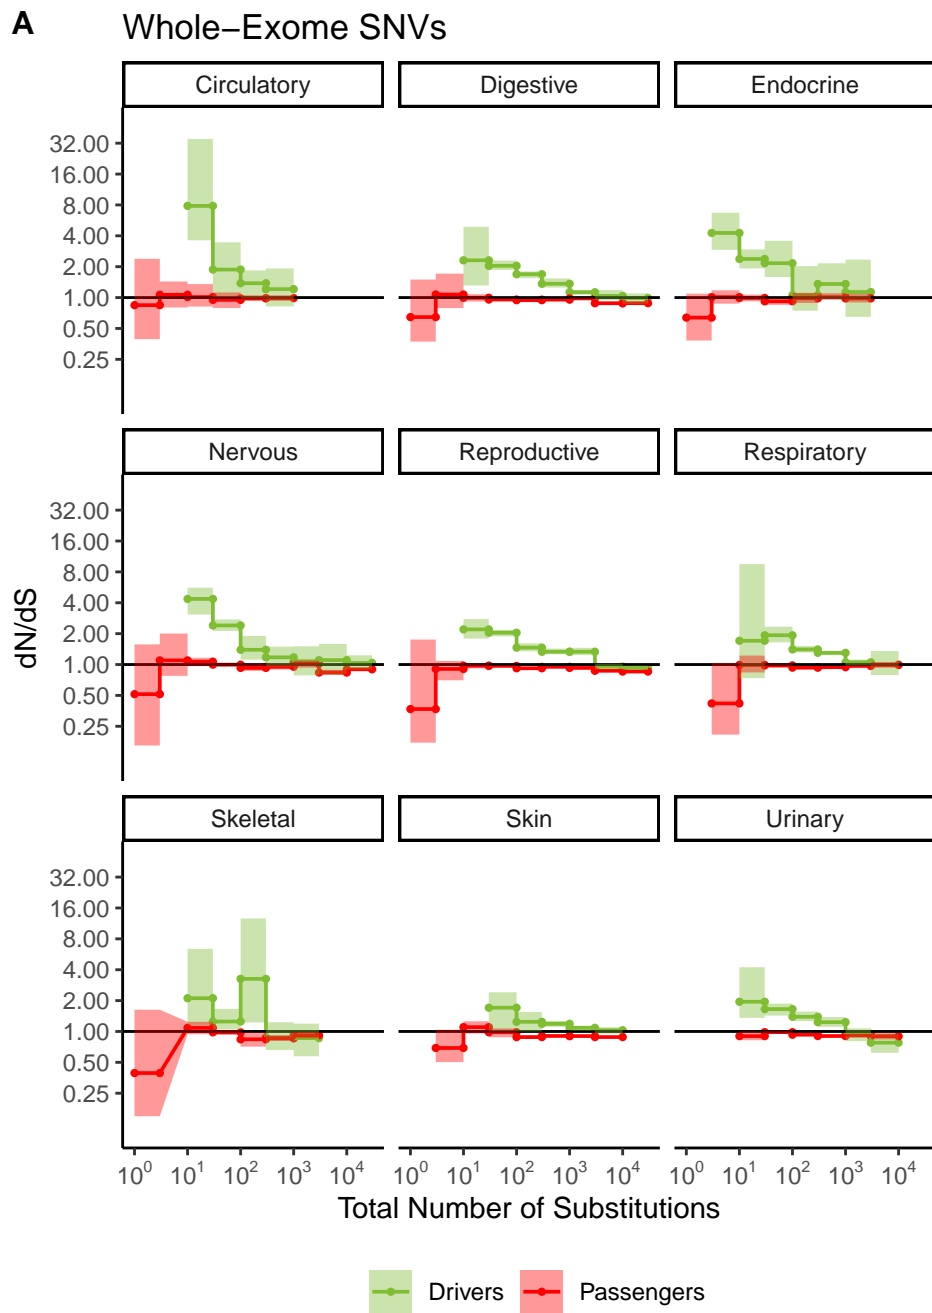

**B**

|              | Drivers     | Drivers    | Passengers  | Passengers |
|--------------|-------------|------------|-------------|------------|
|              | High Burden | Low Burden | High Burden | Low Burden |
| UVM(n=80)    | 1.51        | 1.51       | 1.1         | 0.7        |
| UCS(n=57)    | 1.23        | 3.61       | 0.82        | 1.04       |
| UCEC(n=530)  | 0.93        | 3.45       | 0.85        | 0.84       |
| THYM(n=123)  | 2.64        | 2.64       | 1.18        | 0.91       |
| THCA(n=500)  | 1.02        | 5.01       | 1.03        | 0.61       |
| TGCT(n=150)  | 1.79        | 1.46       | 1.16        | 0.9        |
| STAD(n=439)  | 0.89        | 1.58       | 1.03        | 0.87       |
| SKCM(n=467)  | 1.03        | 1.71       | 0.88        | 0.91       |
| SARC(n=239)  | 0.86        | 1.53       | 0.92        | 1.07       |
| READ(n=151)  | 0.9         | 0.95       | 0.8         | 1.12       |
| PRAD(n=498)  | 0.85        | 1.73       | 0.95        | 0.61       |
| PCPG(n=184)  | 2.03        | 3.32       | 1.46        | 0.27       |
| PAAD(n=178)  | 1.17        | 3.28       | 0.94        | 1.23       |
| OV(n=412)    | 1.48        | 2.93       | 1.01        | 1.05       |
| MESO(n=82)   | 1.41        | 2.66       | 0.91        | 0.23       |
| LUSC(n=485)  | 0.93        | 1.13       | 0.89        | 0.24       |
| LUAD(n=569)  | 1           | 1.77       | 0.98        | 1.1        |
| LIHC(n=365)  | 1.24        | 1.64       | 1.02        | 0.79       |
| LGG(n=526)   | 1.29        | 4.33       | 0.94        | 0.69       |
| LAML(n=138)  | 1.28        | 1.28       | 0.98        | 0.84       |
| KIRP(n=282)  | 1.2         | 1.34       | 1.2         | 0.96       |
| KIRC(n=370)  | 0.95        | 1.32       | 0.98        | 0.76       |
| KICH(n=66)   | 1.51        | 1.48       | 1.11        | 0.95       |
| HNSC(n=509)  | 1.05        | 2.16       | 1.12        | 0.73       |
| GBM(n=402)   | 0.83        | 1.92       | 0.86        | 0.97       |
| ESCA(n=185)  | 1.18        | 2.08       | 0.93        | 0.99       |
| DLBC(n=37)   | 1           | 1.21       | 1.03        | 0.85       |
| COAD(n=408)  | 0.96        | 2.58       | 0.86        | 1          |
| CHOL(n=36)   | 2.77        | 2.17       | 0.9         | 1.41       |
| CESC(n=291)  | 1.04        | 1.74       | 0.97        | 1.22       |
| BRCA(n=1026) | 0.66        | 2.42       | 0.87        | 0.66       |
| BLCA(n=411)  | 0.78        | 2.16       | 0.9         | 1.08       |
| ACC(n=92)    | 1.13        | 2.17       | 0.98        | 1.06       |

dN/dS color scale: 0.6 (green), 0.3, 0.0, -0.3, -0.6 (red)
