# Supplementary figures and images for: Most cancers carry a substantial deleterious load due to Hill-Robertson interference
Source: eLife journal article supplement (doi:10.7554/elife.67790), 2022-09-01

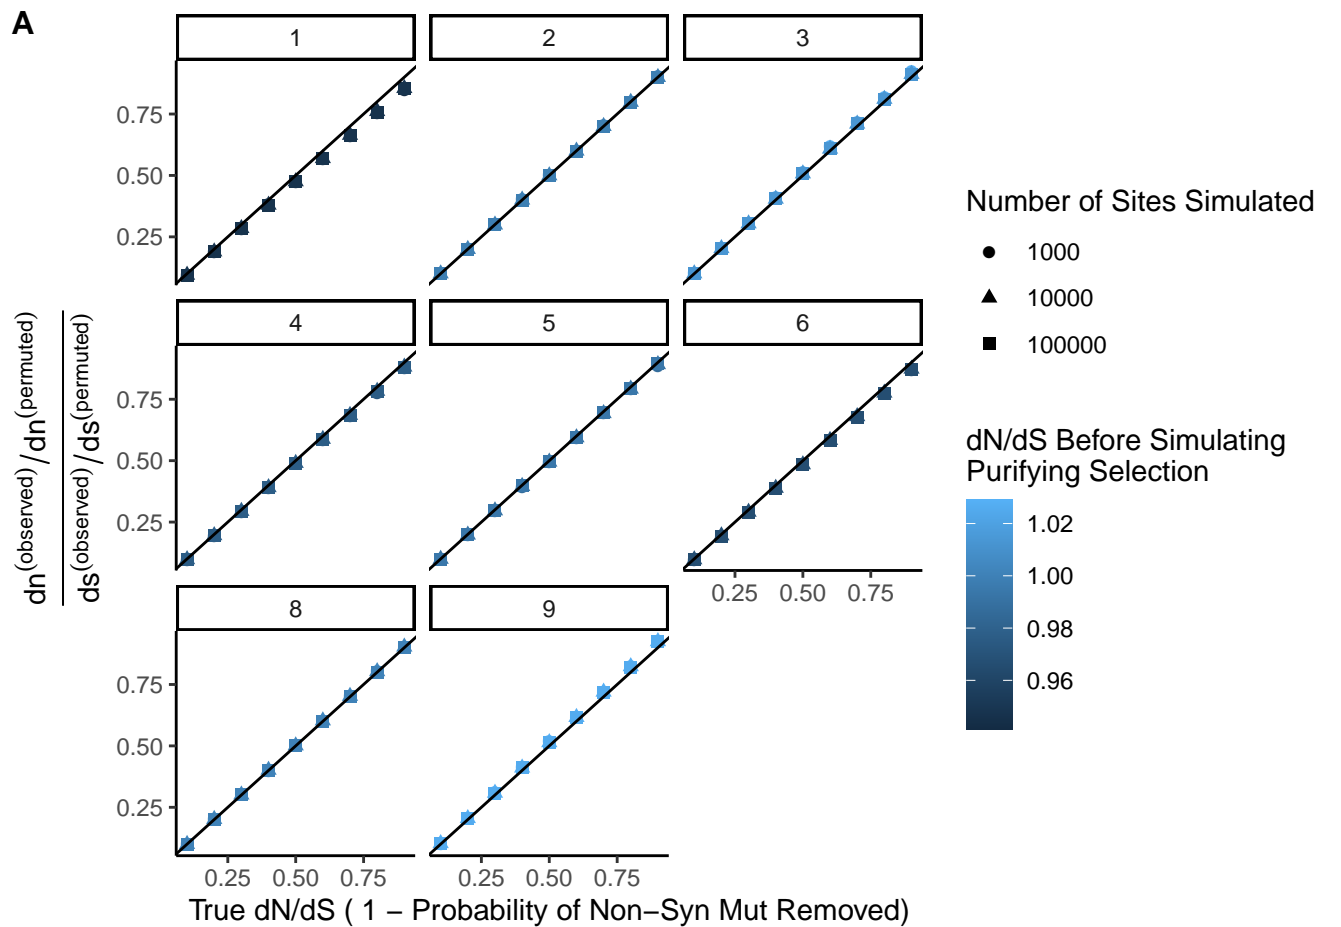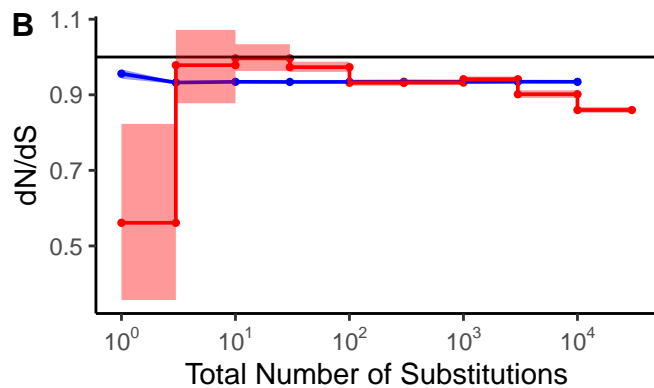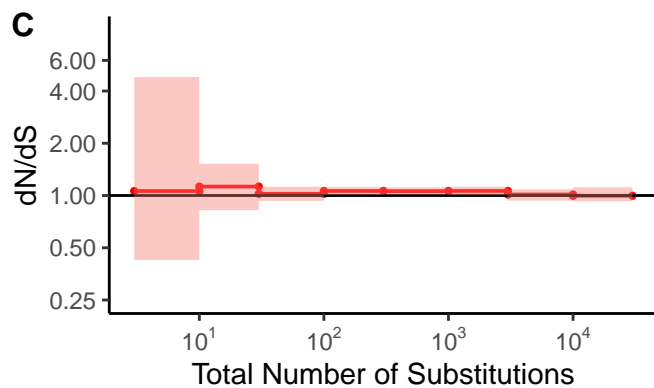

Supplement: supp [file elife-67790-supp-v1.zip › elife_poa_e67790_Figure_2_figure_supplement_2.pdf]

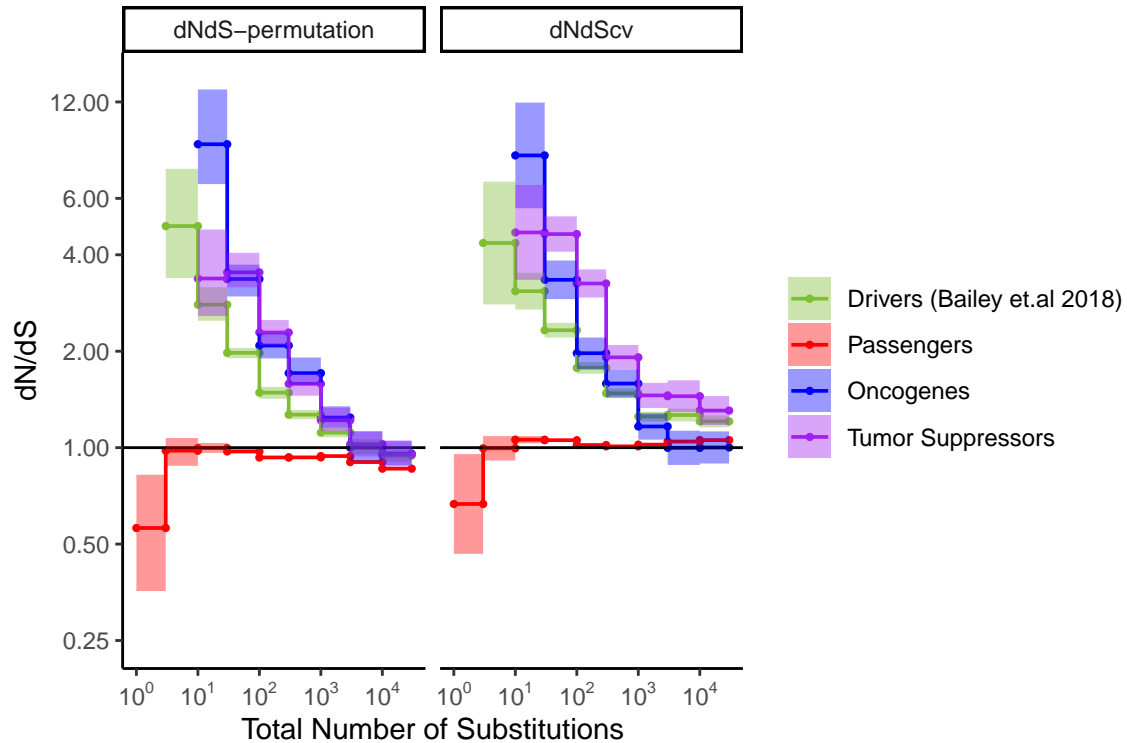

Supplement: supp [file elife-67790-supp-v1.zip › elife_poa_e67790_Figure_2_figure_supplement_3.pdf]

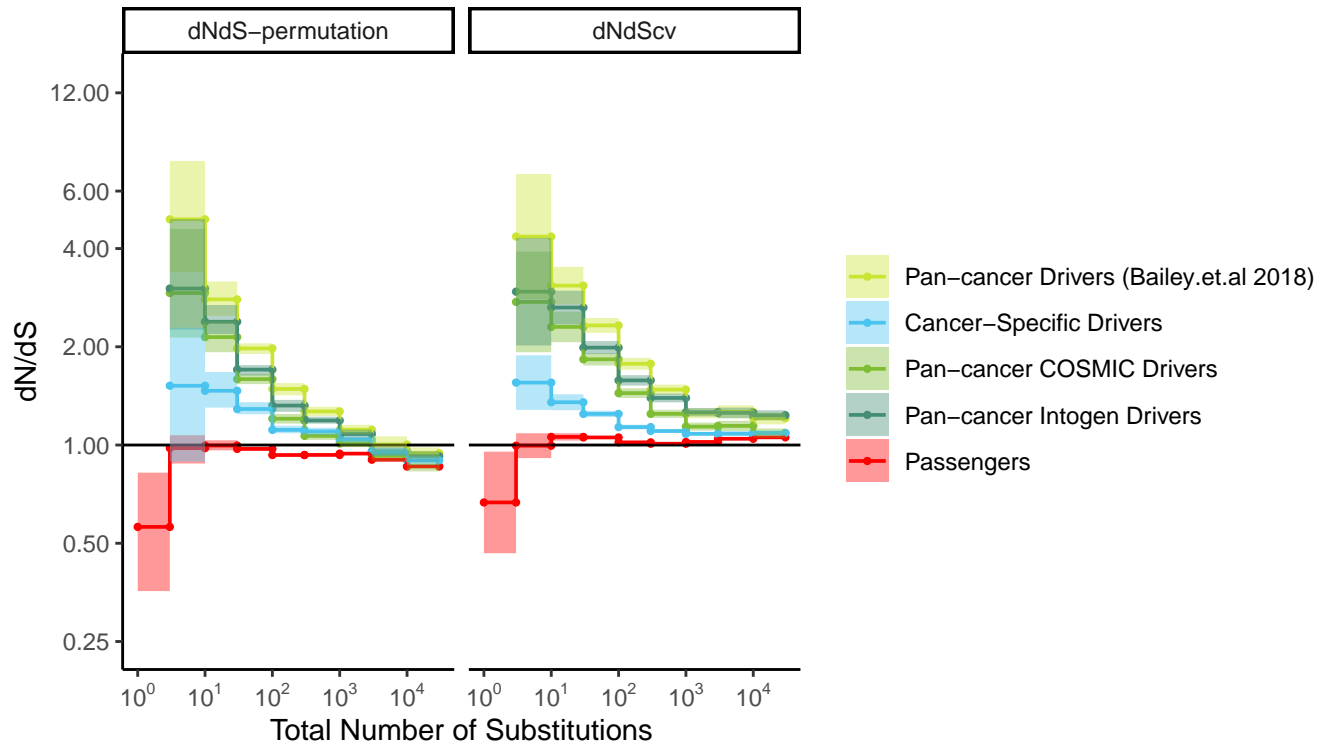

Supplement: supp [file elife-67790-supp-v1.zip › elife_poa_e67790_Figure_2_figure_supplement_5.pdf]

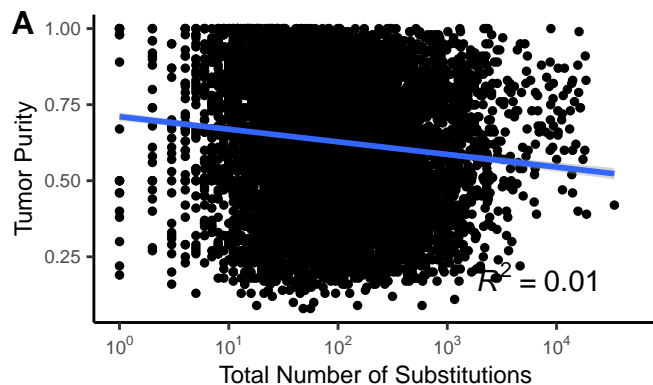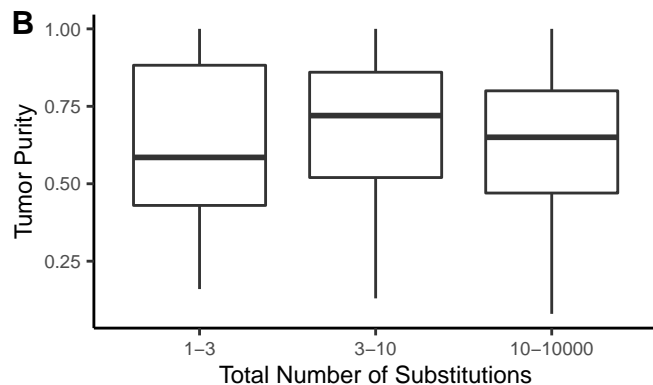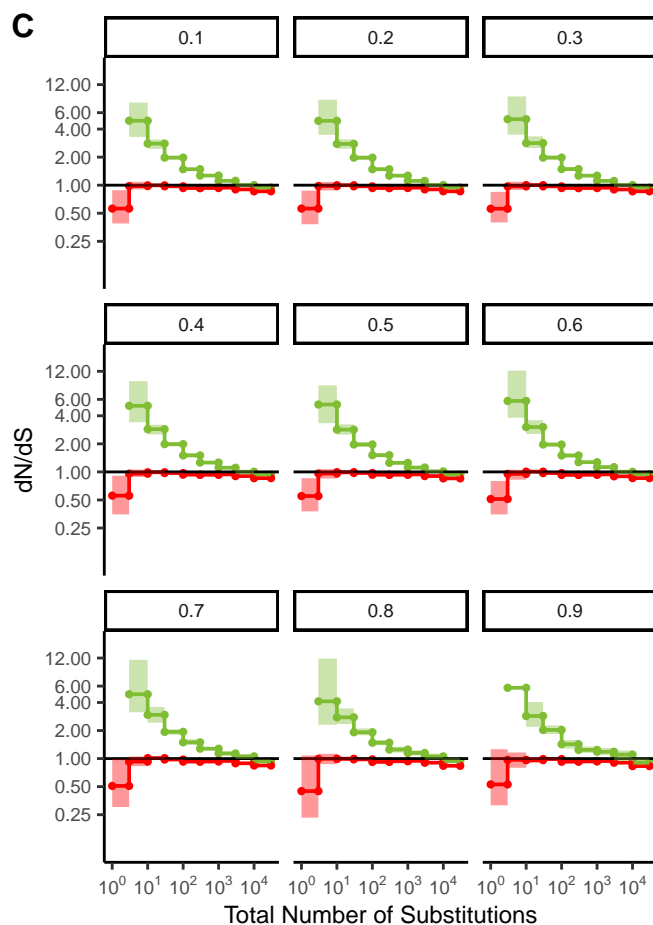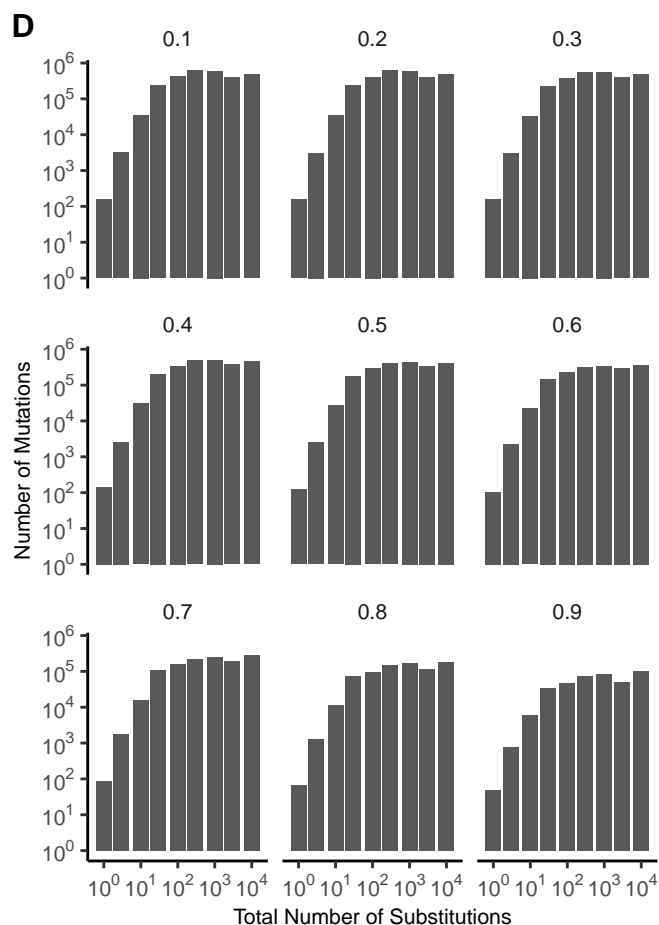

Supplement: supp [file elife-67790-supp-v1.zip › elife_poa_e67790_Figure_2_figure_supplement_6.pdf]

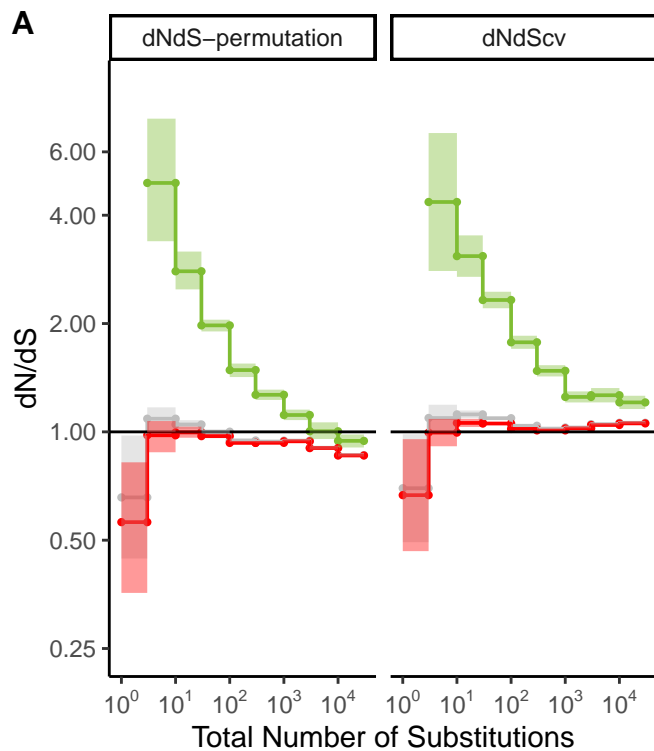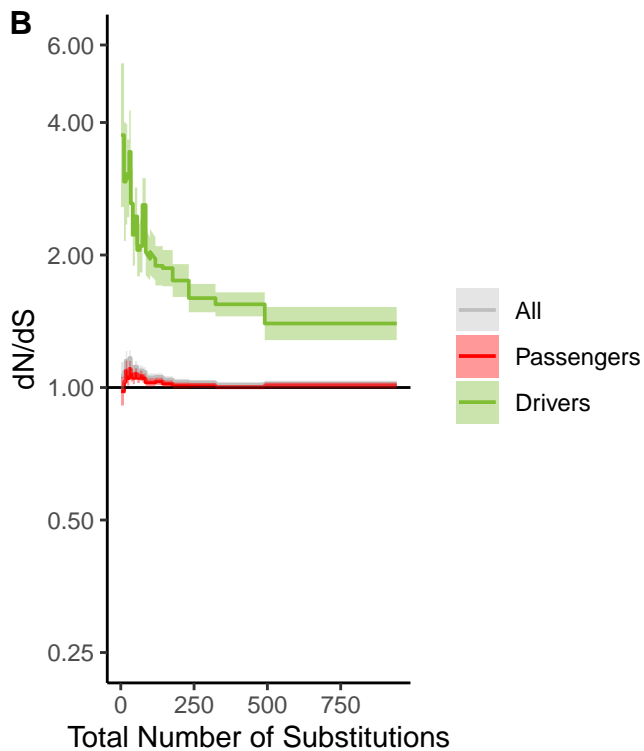

Supplement: supp [file elife-67790-supp-v1.zip › elife_poa_e67790_Figure_2_figure_supplement_7.pdf]

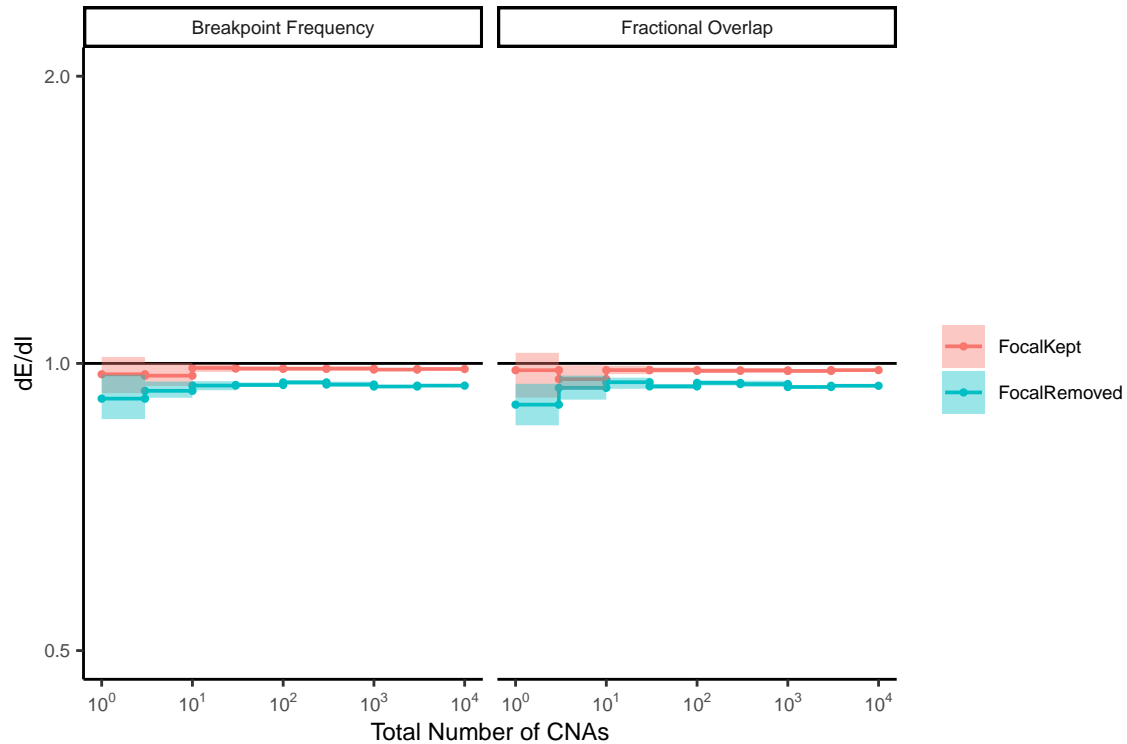

Supplement: supp [file elife-67790-supp-v1.zip › elife_poa_e67790_Figure_2_figure_supplement_8.pdf]

# Fractional Overlap of CNAs

<100Kb

>100Kb

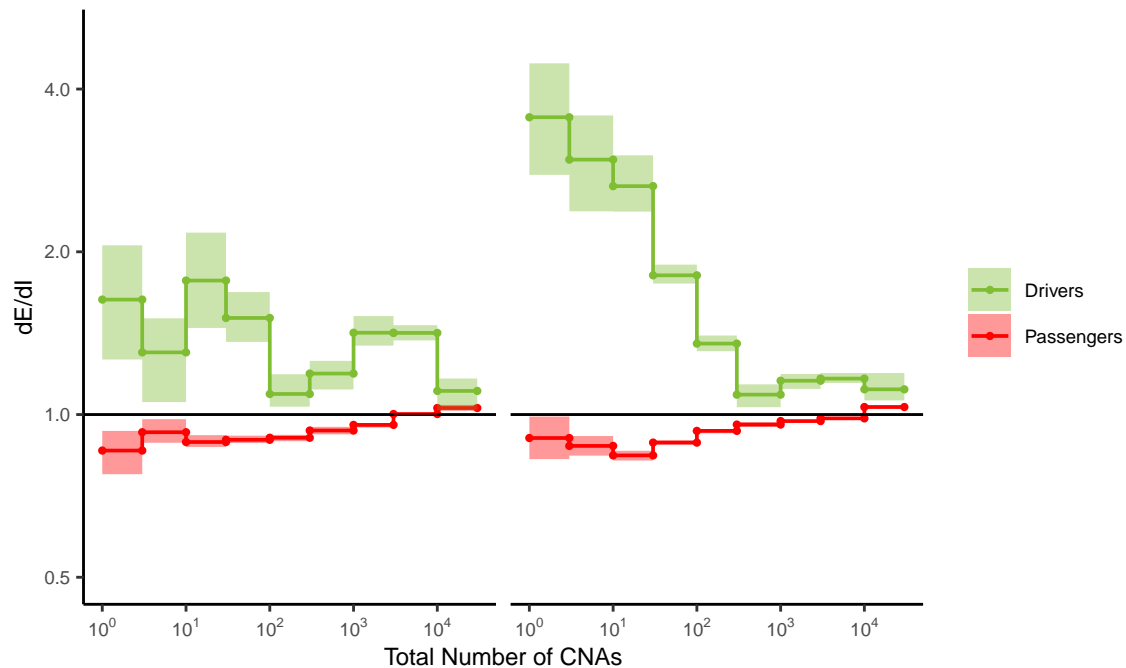

Supplement: supp [file elife-67790-supp-v1.zip › elife_poa_e67790_Figure_2_figure_supplement_9.pdf]

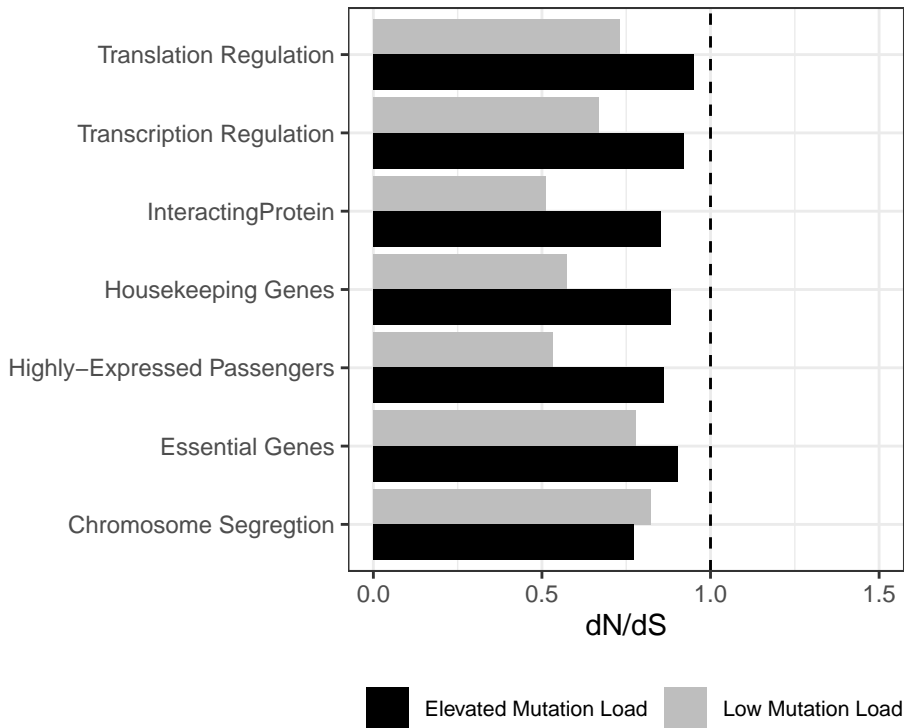

Supplement: supp [file elife-67790-supp-v1.zip › elife_poa_e67790_Figure_2_figure_supplement_11.pdf]

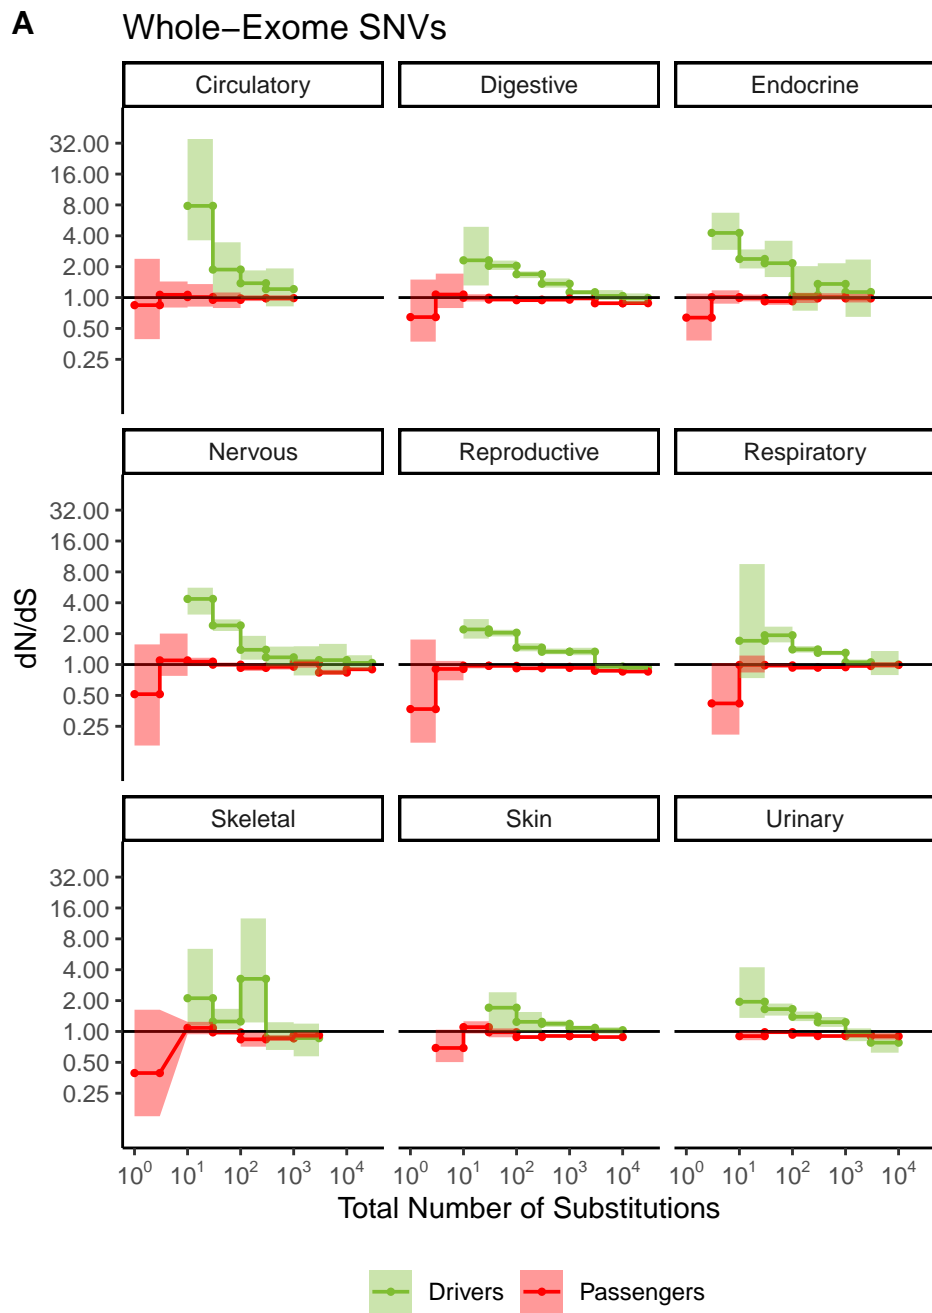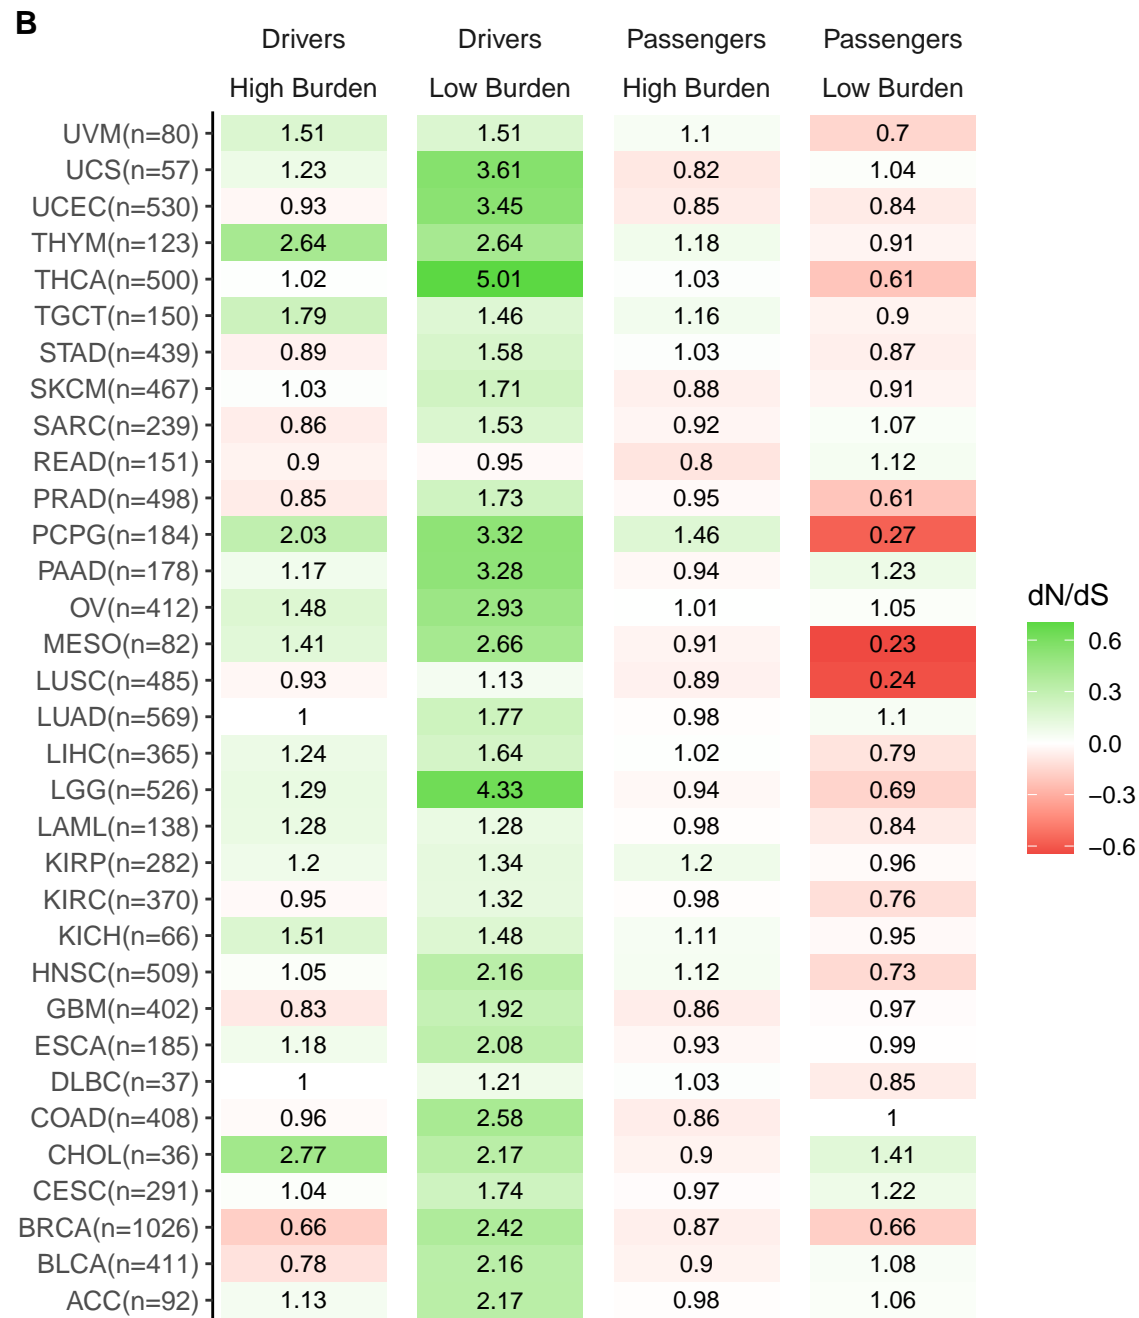

Supplement: supp [file elife-67790-supp-v1.zip › elife_poa_e67790_Figure_2_figure_supplement_12.pdf]

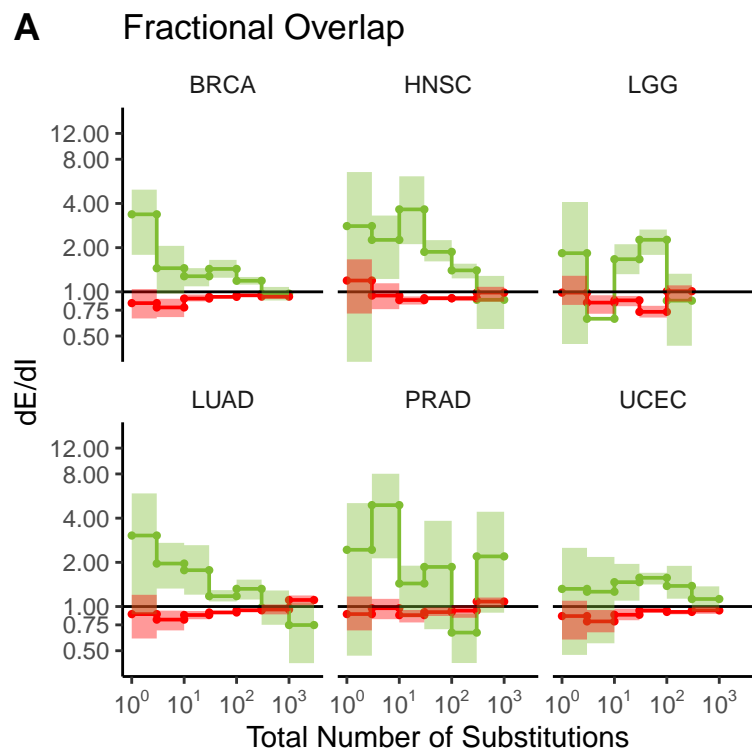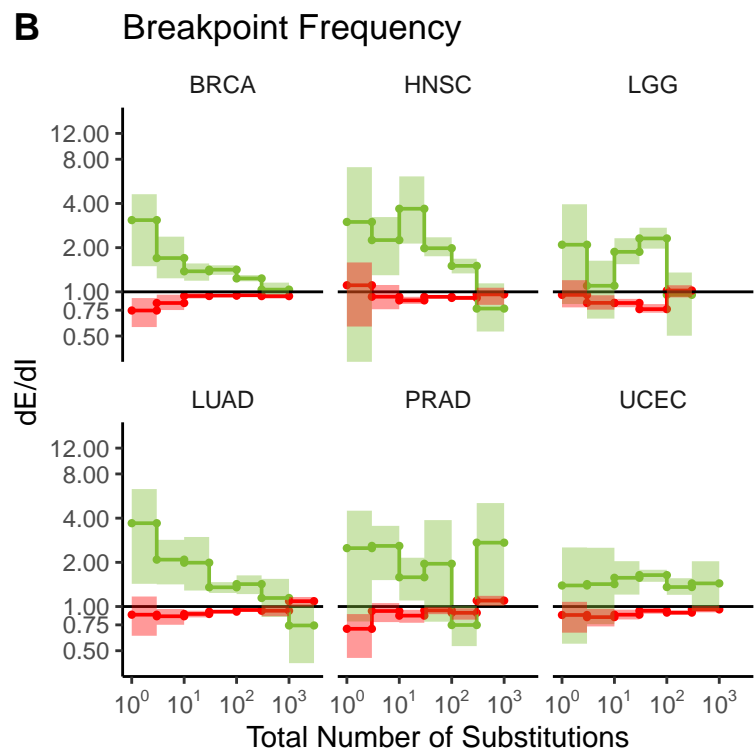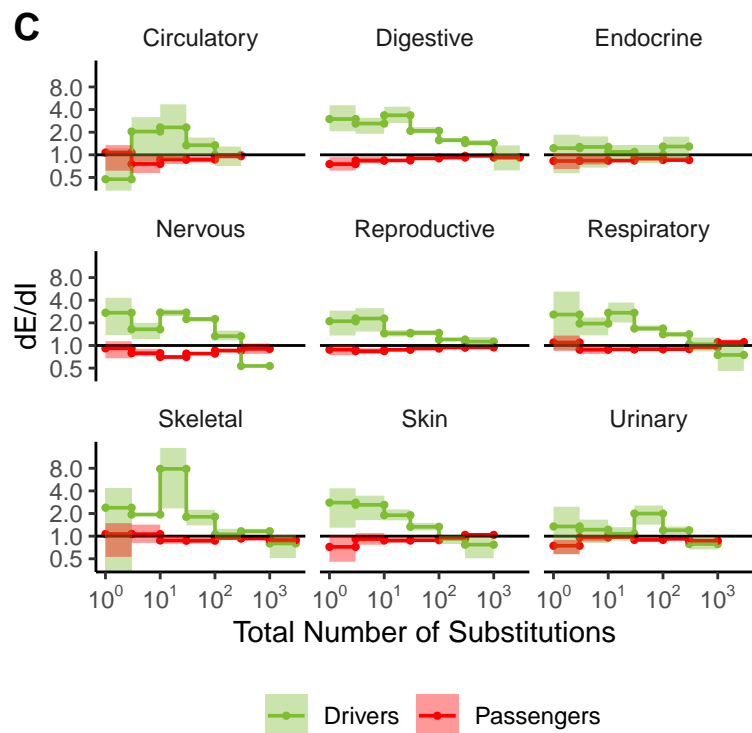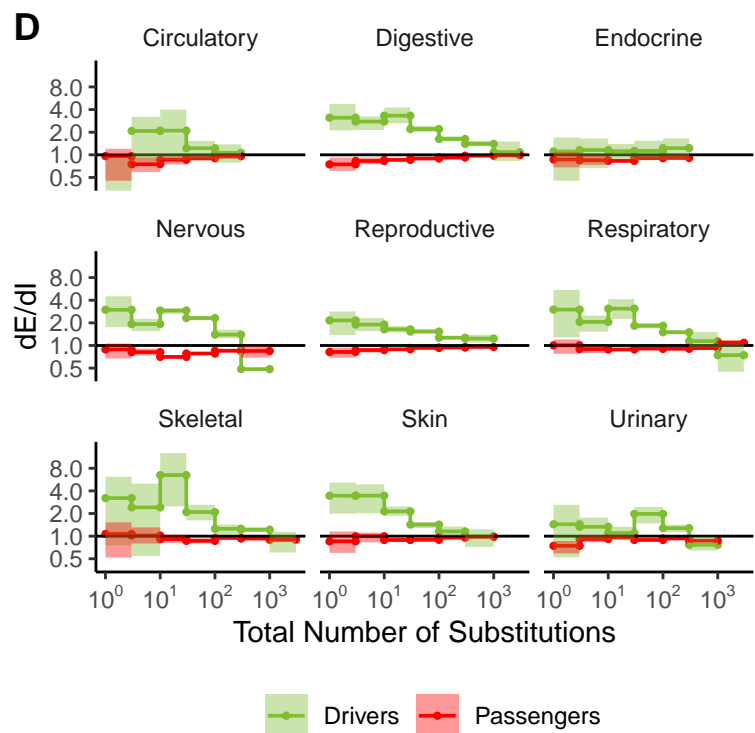

Supplement: supp [file elife-67790-supp-v1.zip › elife_poa_e67790_Figure_2_figure_supplement_13.pdf]

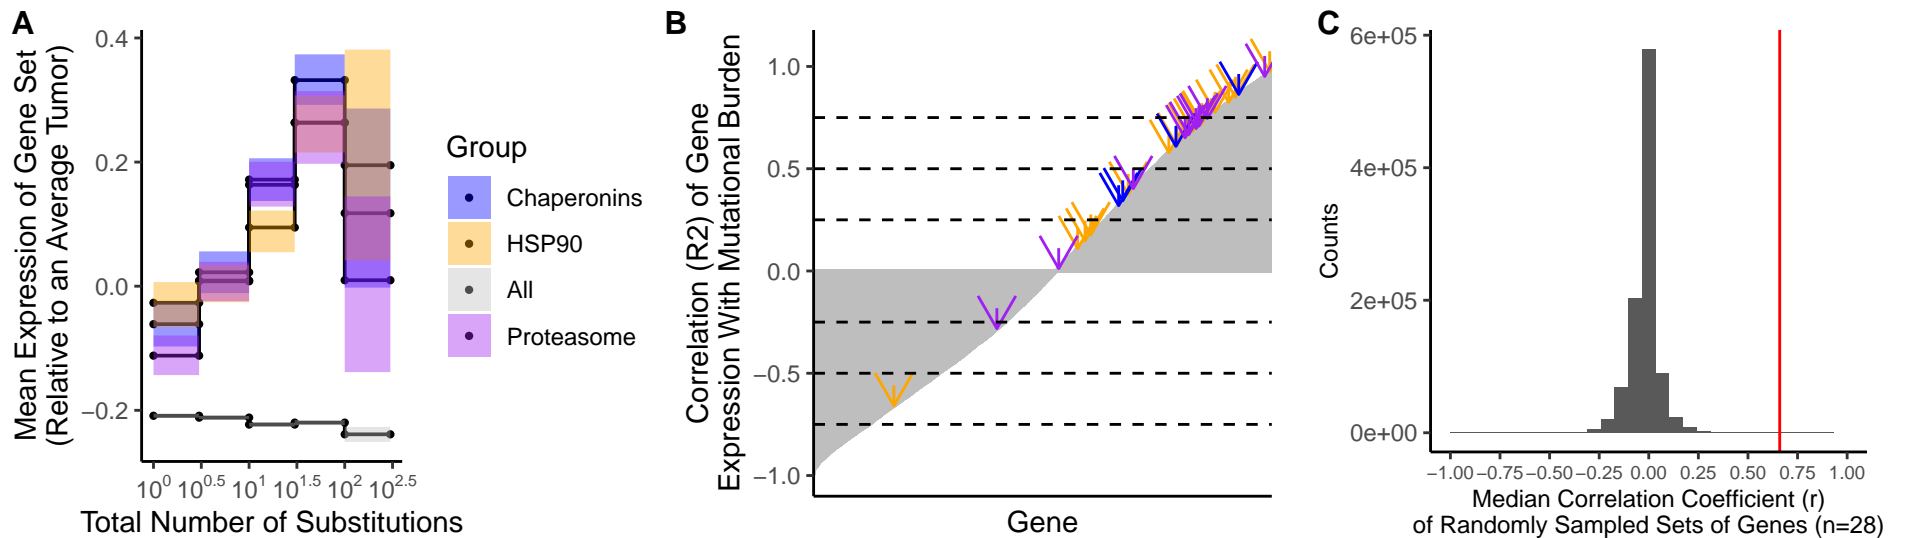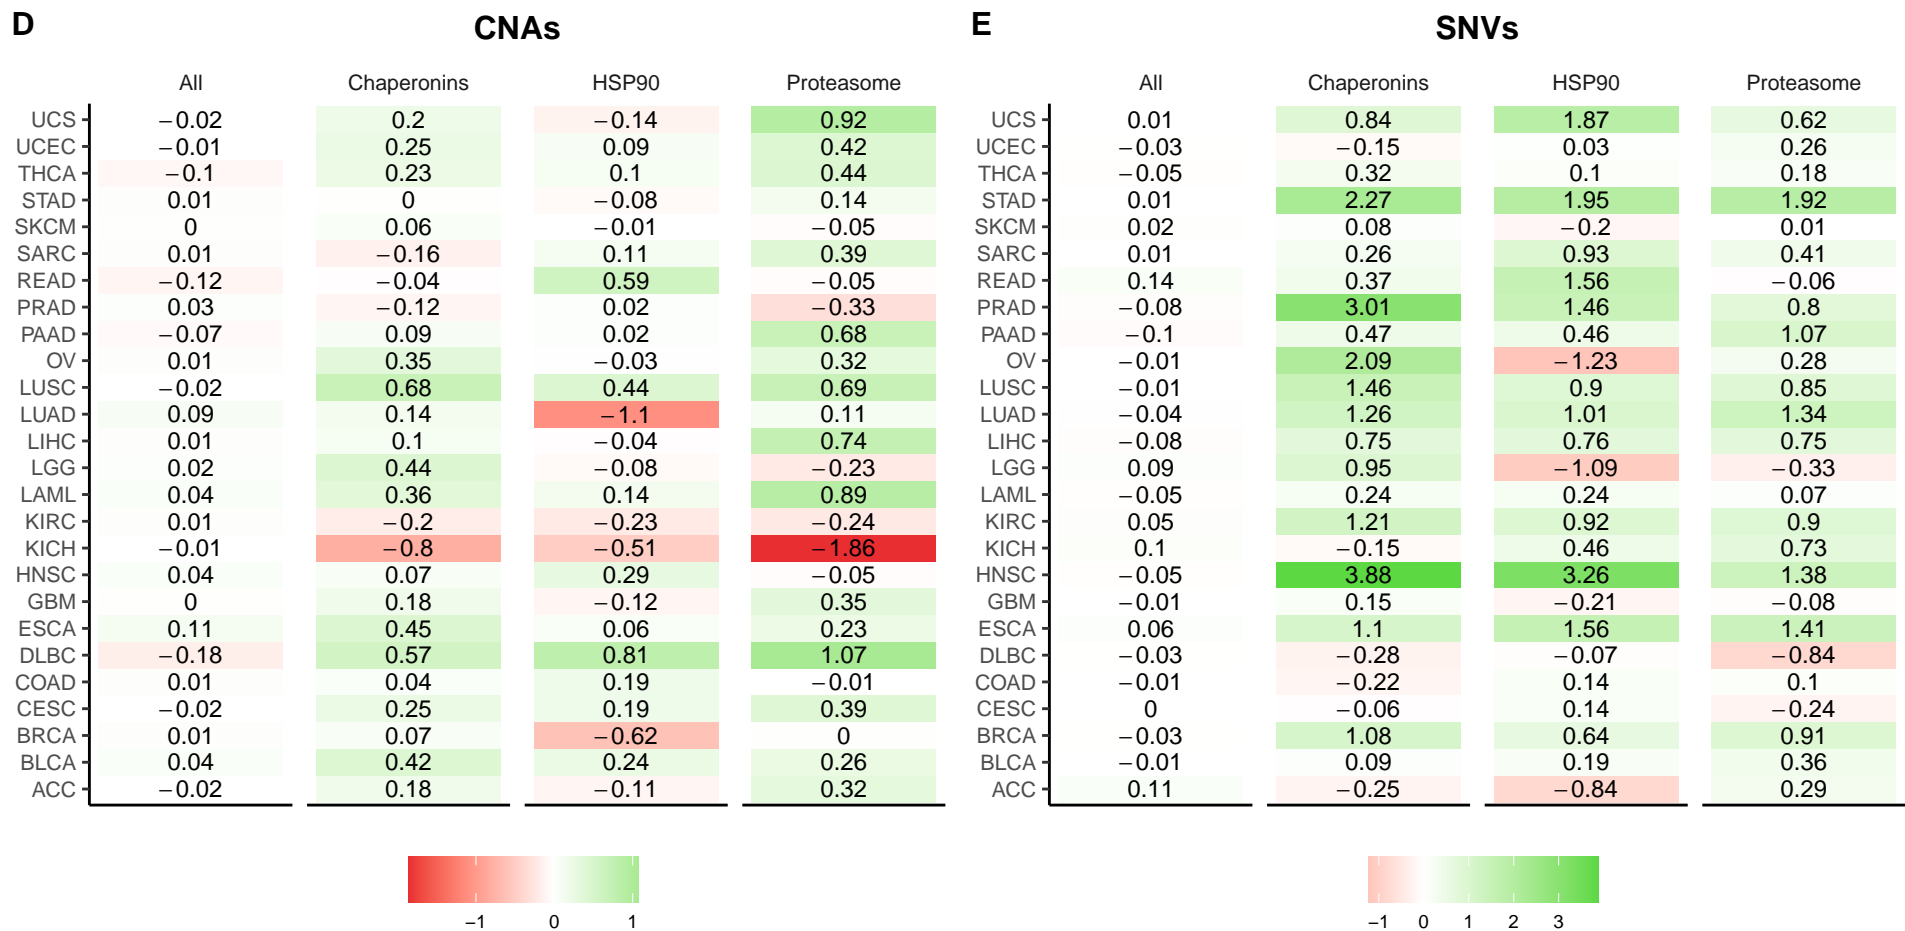

Supplement: supp [file elife-67790-supp-v1.zip › elife_poa_e67790_Figure_2_figure_supplement_14.pdf]

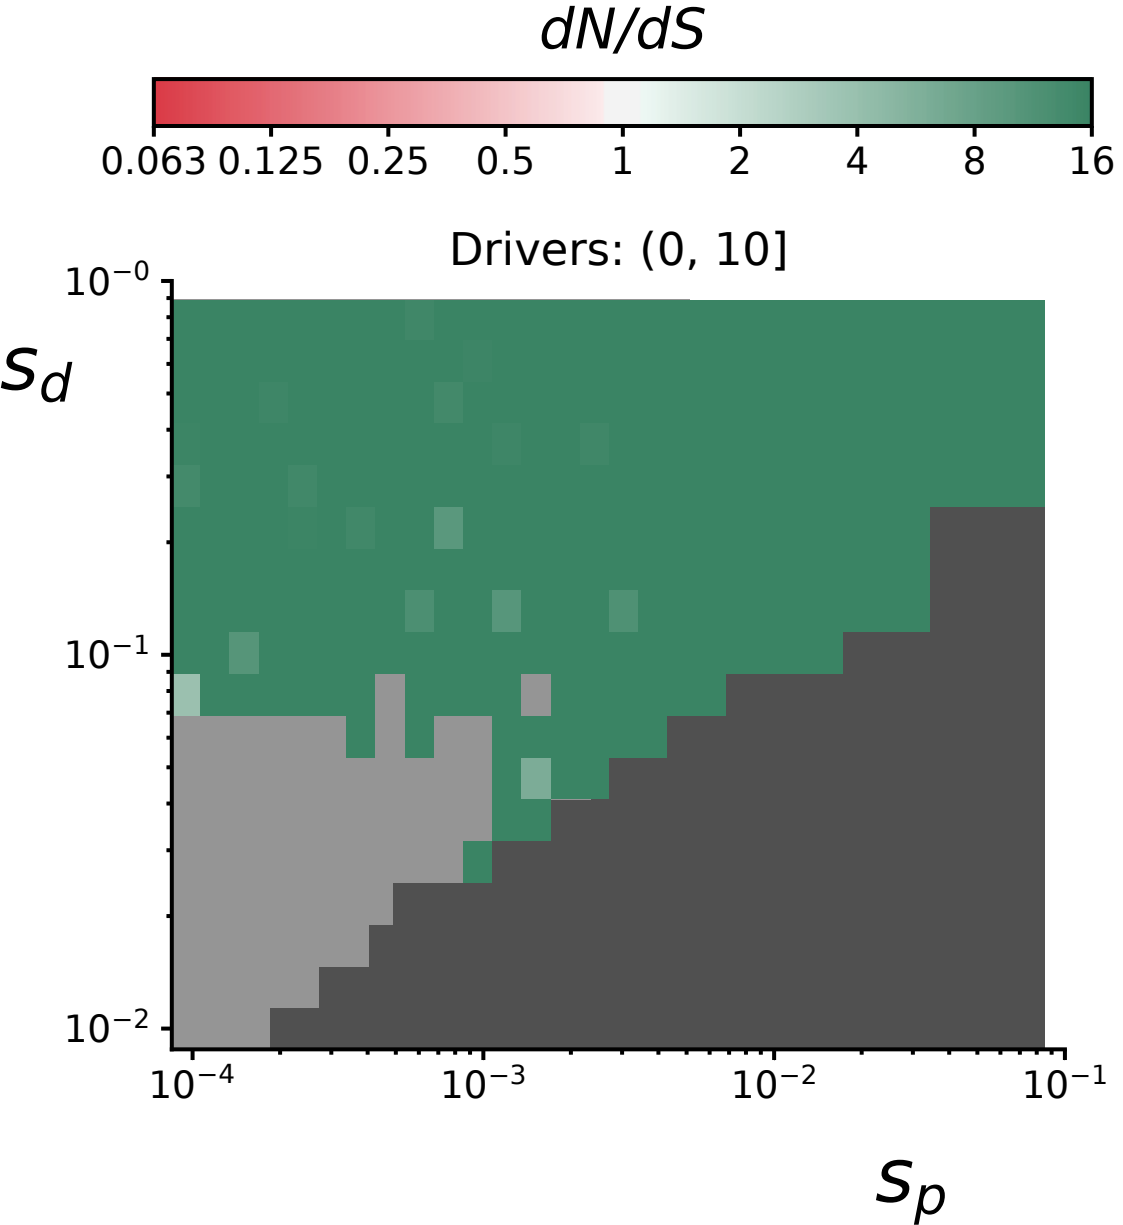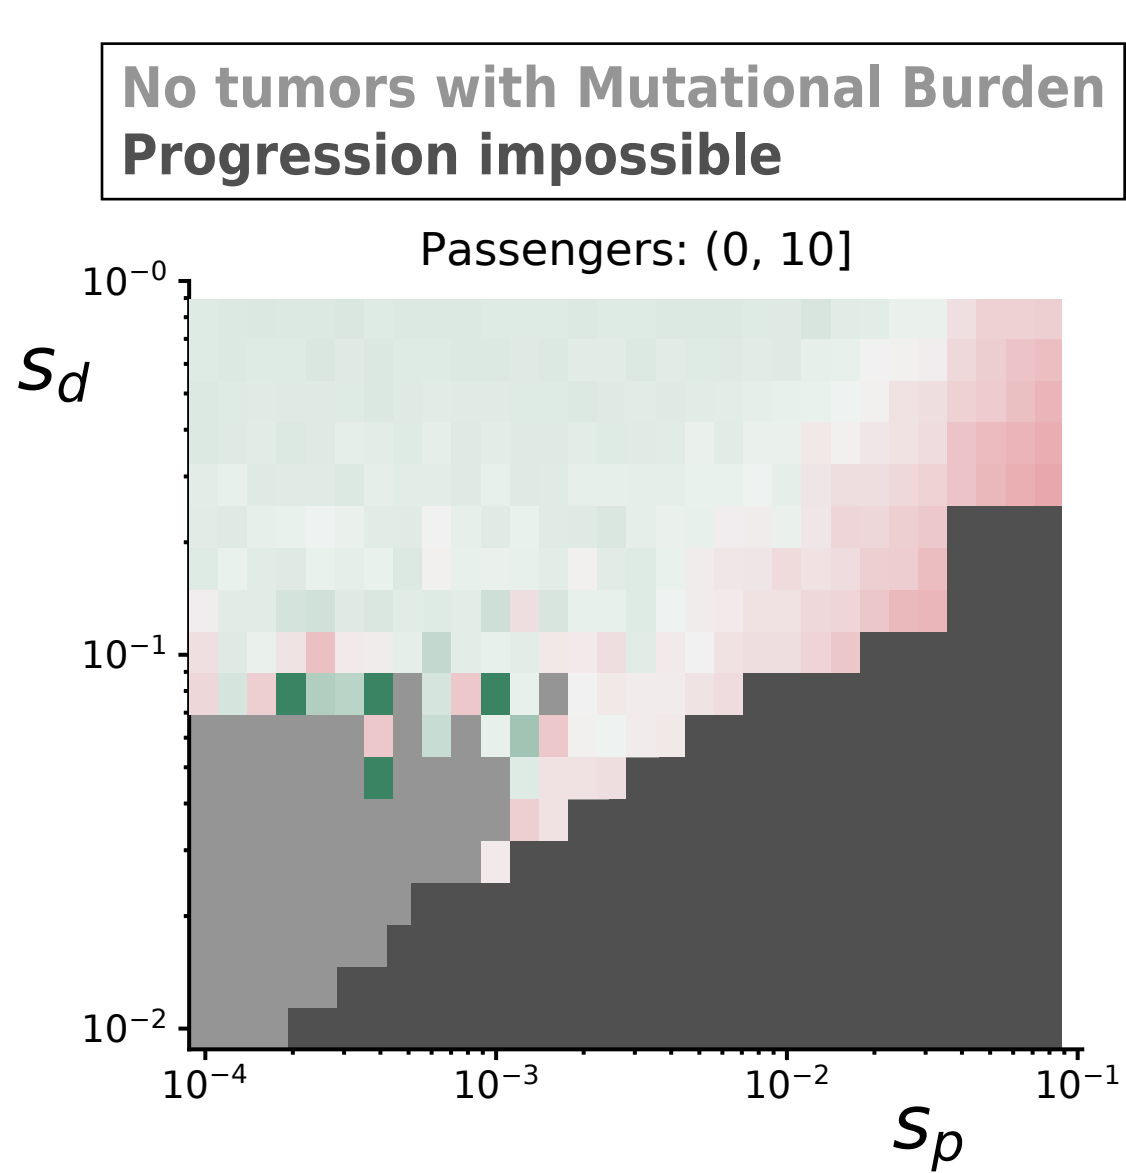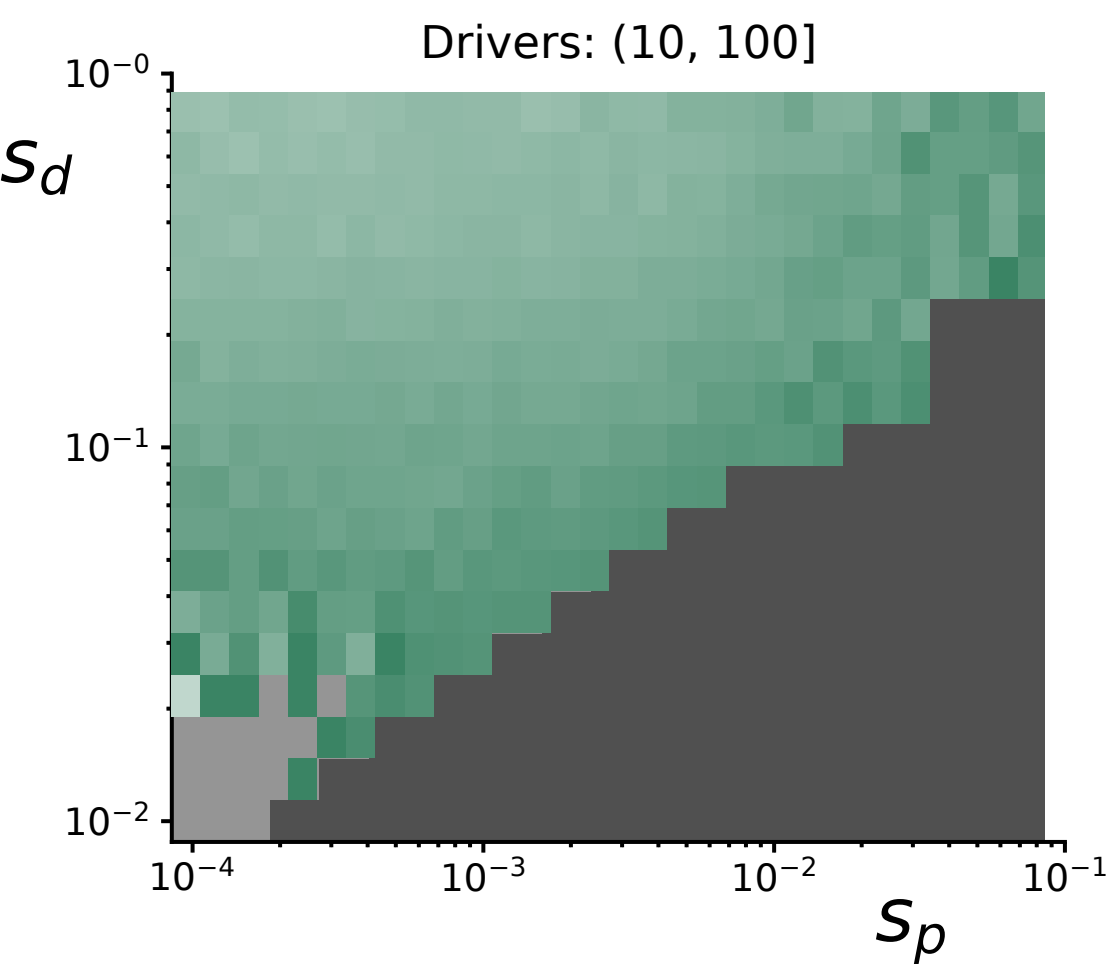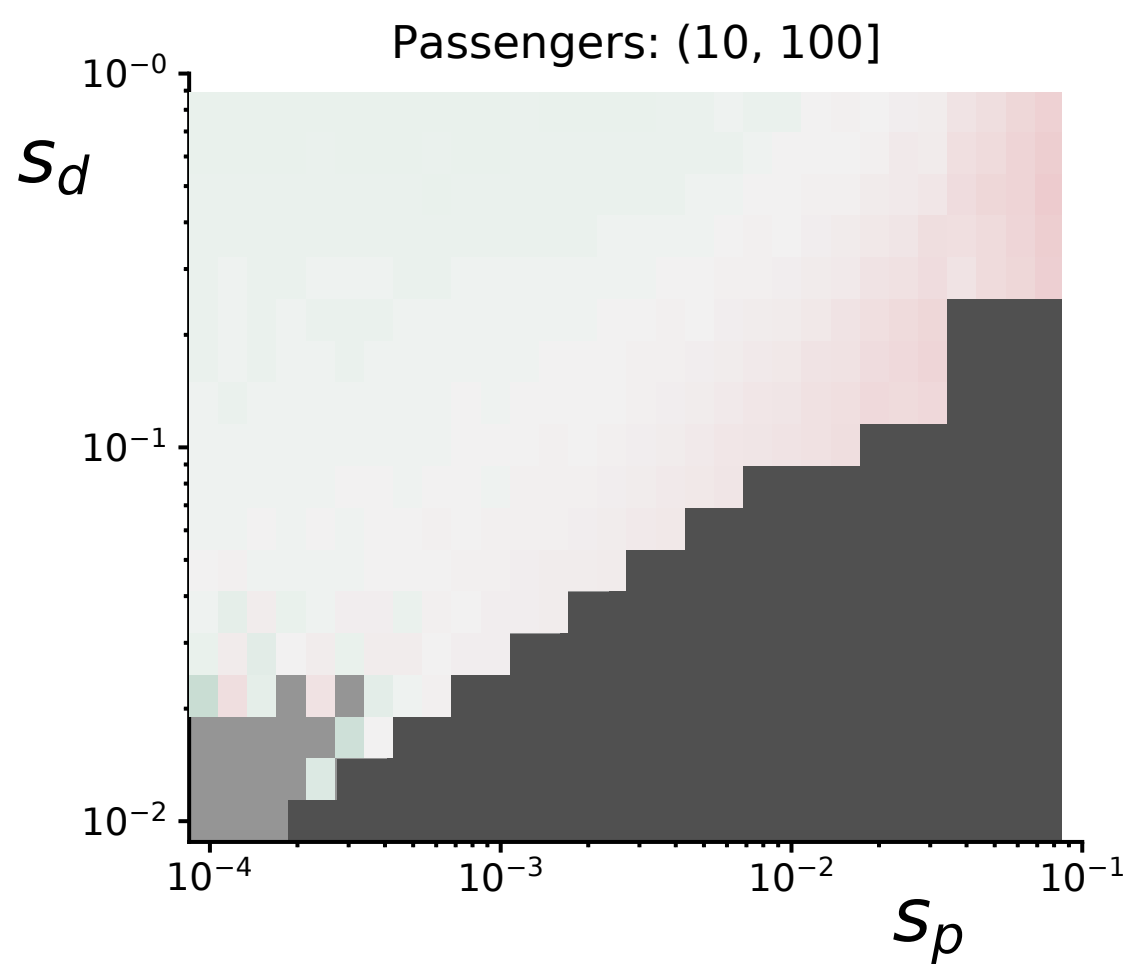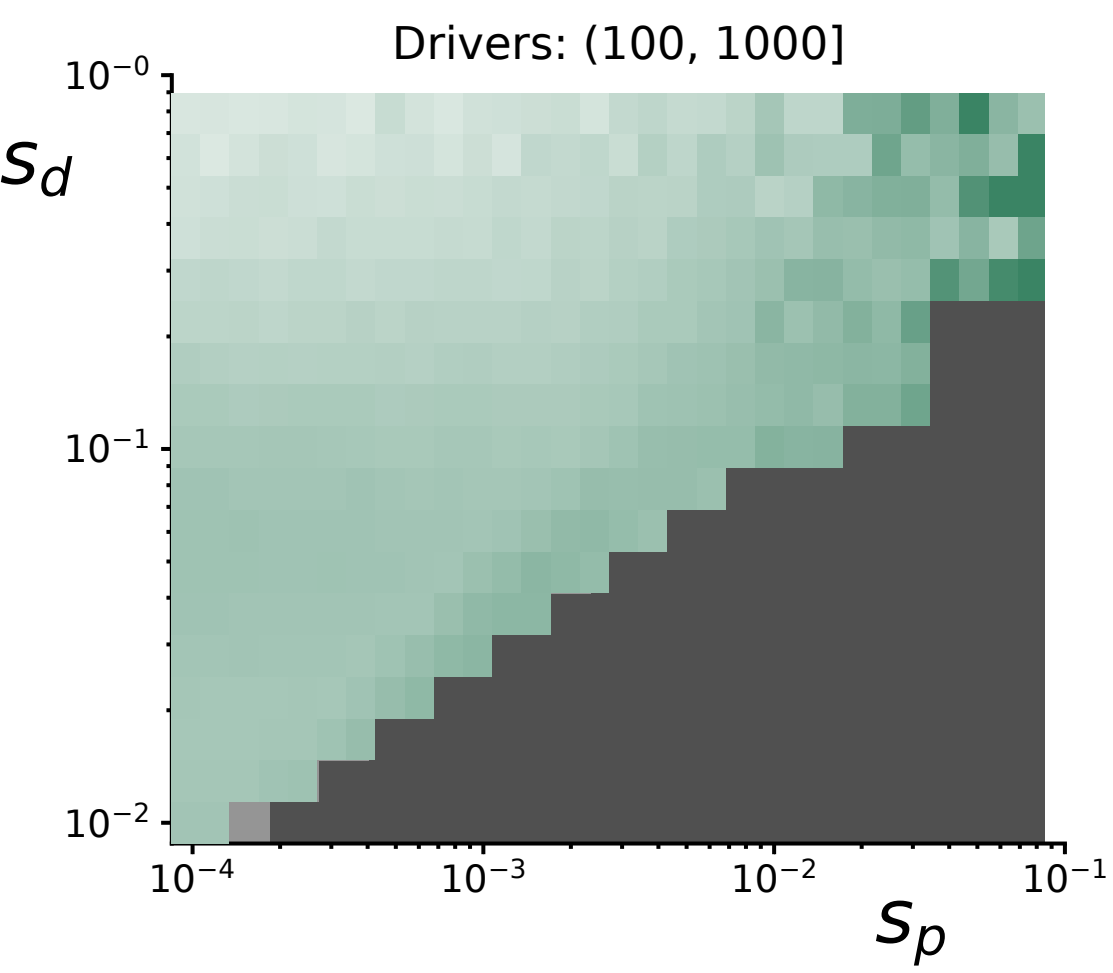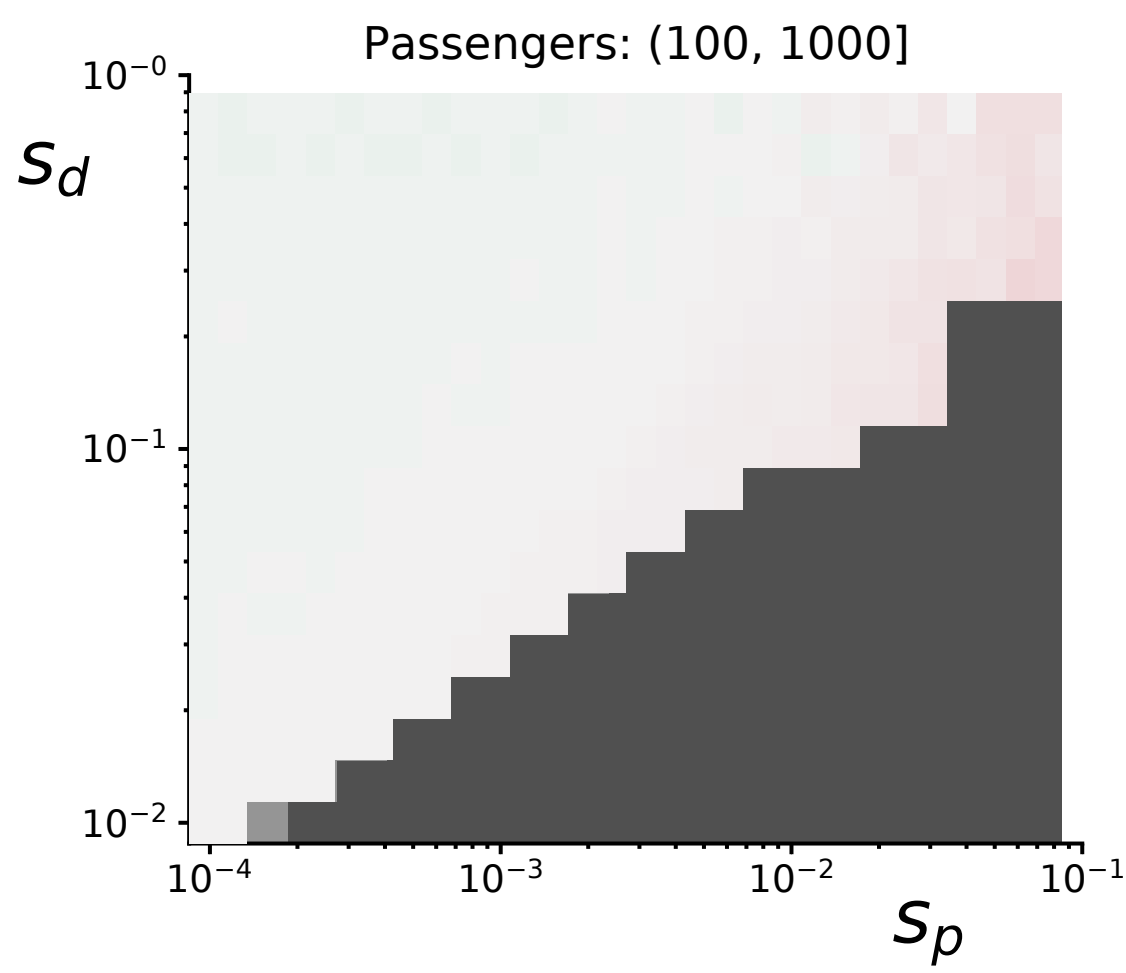

Supplement: supp [file elife-67790-supp-v1.zip › elife_poa_e67790_Figure_3_figure_supplement_1.pdf]

A

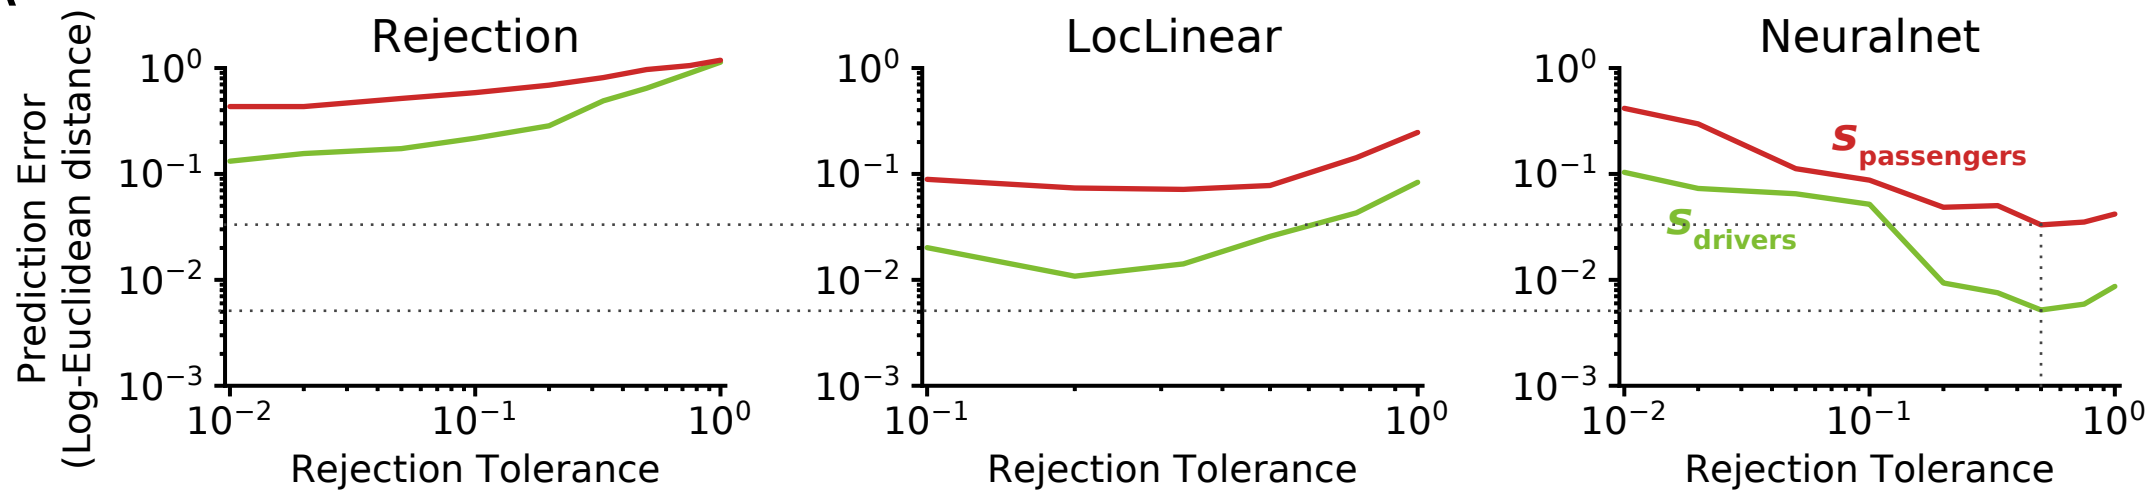

B

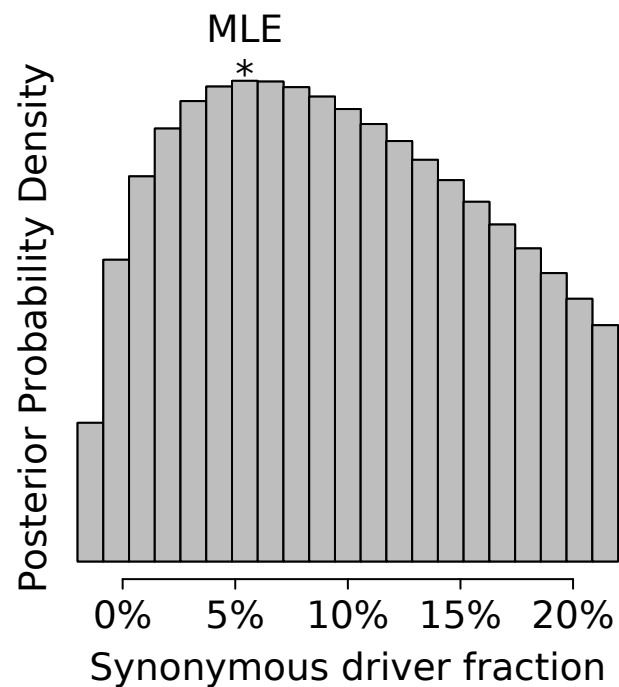

C

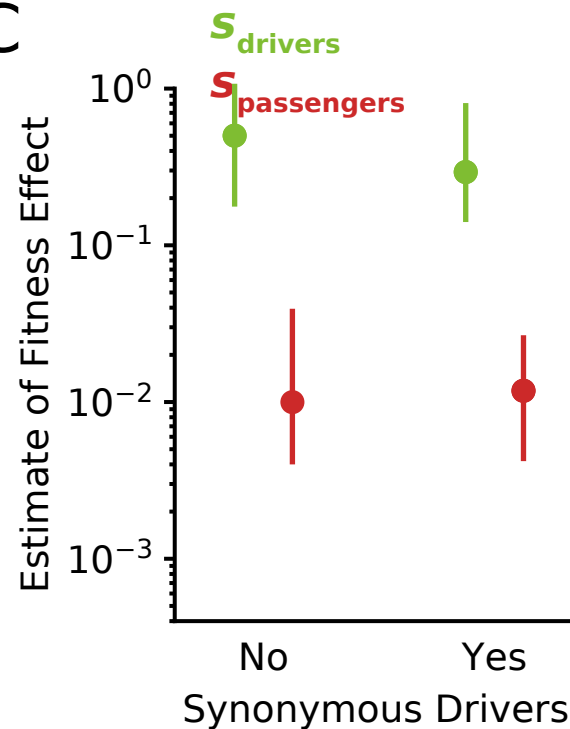

Supplement: supp [file elife-67790-supp-v1.zip › elife_poa_e67790_Figure_3_figure_supplement_3.pdf]

A

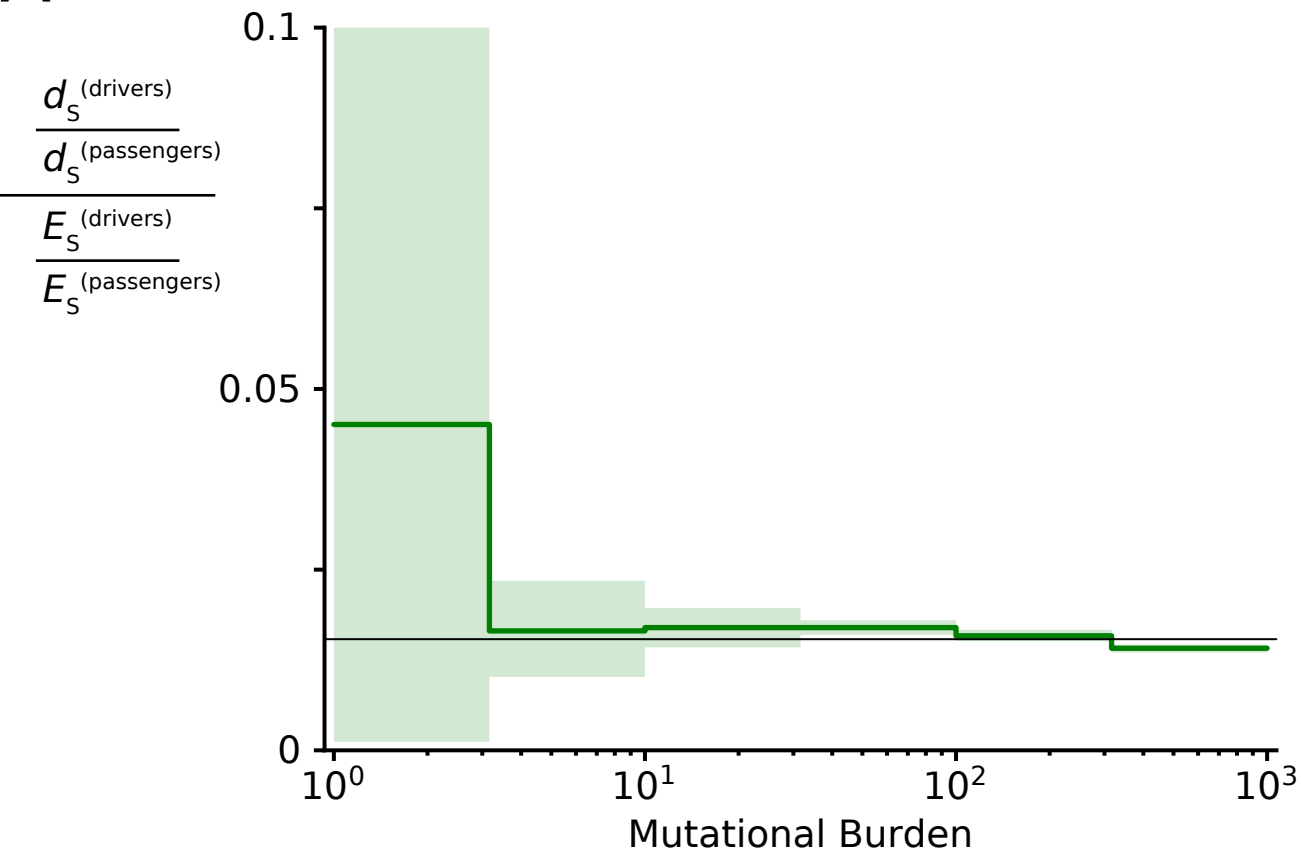

B

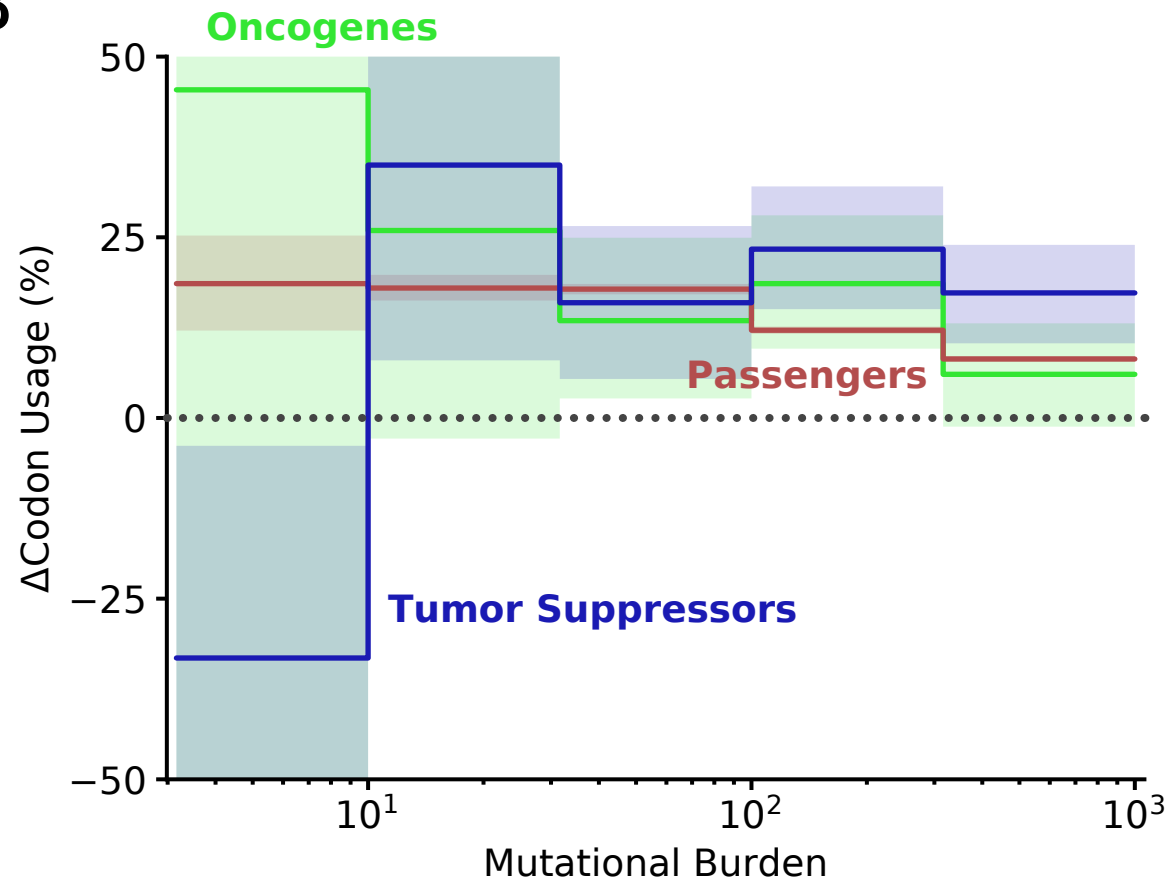

Supplement: supp [file elife-67790-supp-v1.zip › elife_poa_e67790_Figure_3_figure_supplement_4.pdf]

**A**

Simulated Tumors

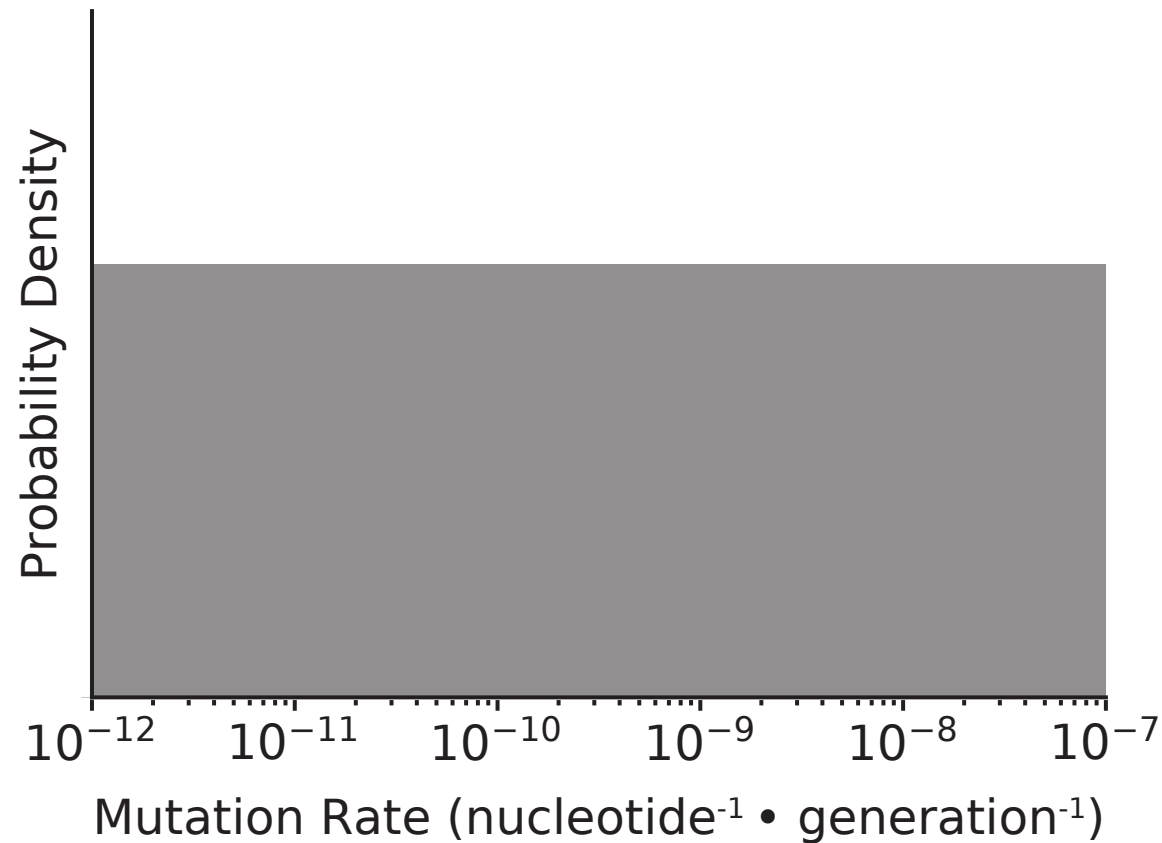**B**

Progressed to Cancer within 100 Years

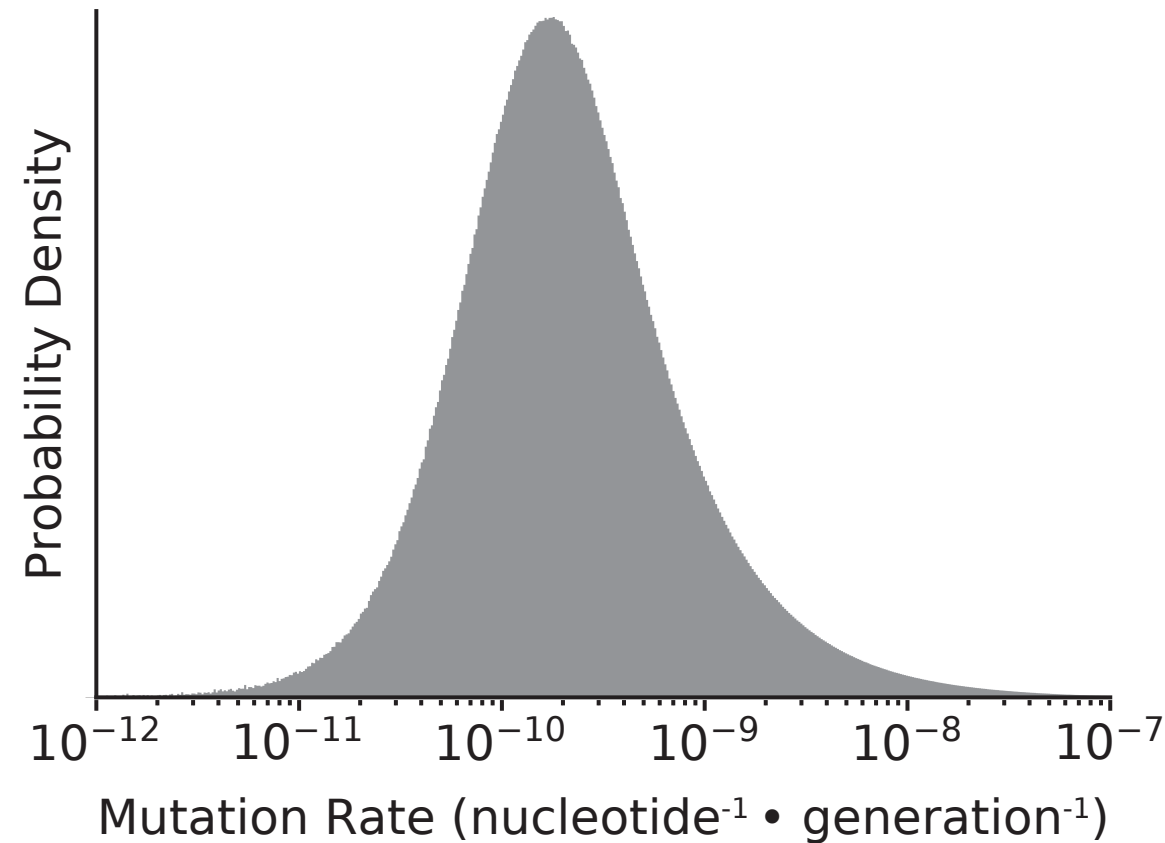

Supplement: supp [file elife-67790-supp-v1.zip › elife_poa_e67790_Figure_3_figure_supplement_5.pdf]

Subclonal SNVs by AF Threshold

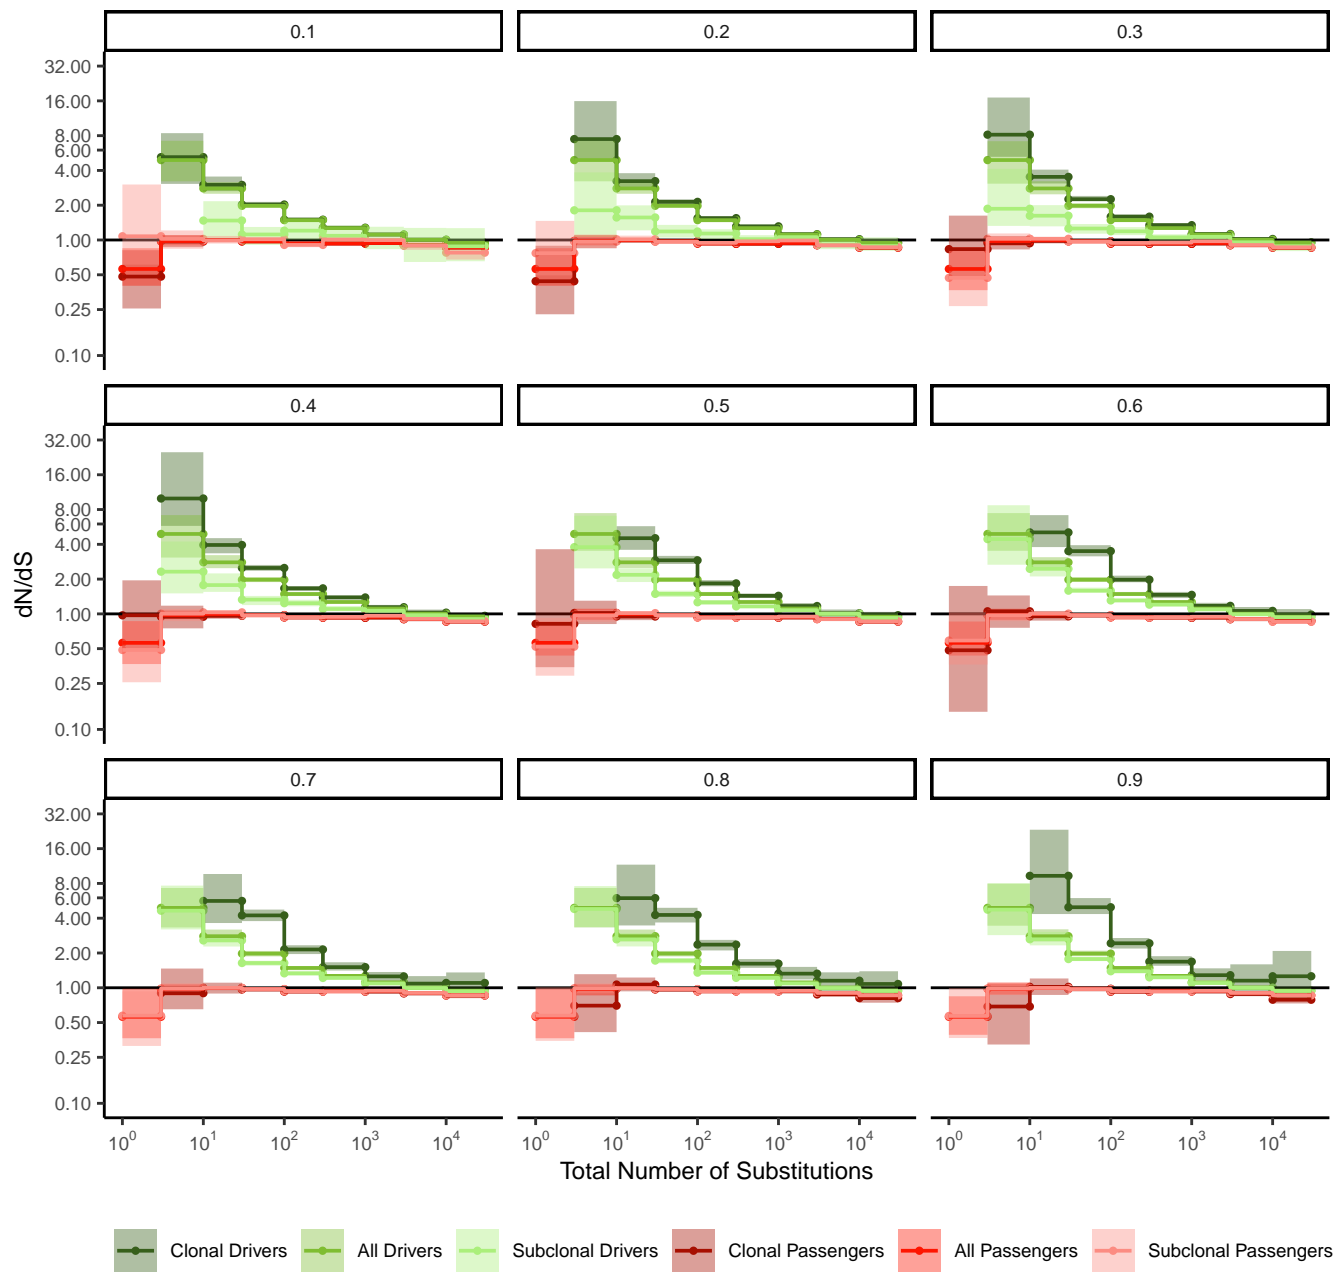

Supplement: supp [file elife_poa_e67790_Figure_2_figure_supplement_10.pdf › elife_poa_e67790_Figure_2_figure_supplement_10.pdf]
